1  
2  
3  
4  
5  
6  
7  
8  
9

## **A Novel Class of Inferior Colliculus Principal Neurons Labeled in Vasoactive Intestinal Peptide-Cre Mice**

*David Goyer<sup>1</sup>, Marina A. Silveira<sup>1</sup>, Alexander P. George<sup>1</sup>, Nichole L. Beebe<sup>2</sup>, Ryan M. Edelbrock<sup>2</sup>,  
Peter T. Malinski<sup>1</sup>, Brett R. Schofield<sup>2</sup>, Michael T. Roberts<sup>1,\*</sup>*

<sup>1</sup>Kresge Hearing Research Institute, Department of Otolaryngology – Head and Neck Surgery, University  
of Michigan, Ann Arbor, Michigan 48109

<sup>2</sup>Department of Anatomy and Neurobiology, Northeast Ohio Medical University, Rootstown, Ohio 44272

\*Corresponding author: [microb@umich.edu](mailto:microb@umich.edu)

10 **Abstract**

11 Located in the midbrain, the inferior colliculus (IC) is the hub of the central auditory system. Although  
12 the IC plays important roles in speech processing, sound localization, and other auditory computations,  
13 the organization of the IC microcircuitry remains largely unknown. Using a multifaceted approach in  
14 mice, we have identified vasoactive intestinal peptide (VIP) neurons as a novel class of IC principal  
15 neurons. VIP neurons are glutamatergic stellate cells with sustained firing patterns. Their extensive  
16 axons project to long-range targets including the auditory thalamus, auditory brainstem, superior  
17 colliculus, and periaqueductal gray. Using optogenetic circuit mapping, we found that VIP neurons  
18 integrate input from the contralateral IC and the dorsal cochlear nucleus. The dorsal cochlear nucleus  
19 also drove feedforward inhibition to VIP neurons, indicating that inhibitory circuits within the IC shape  
20 the temporal integration of ascending inputs. Thus, VIP neurons are well-positioned to influence  
21 auditory computations in a number of brain regions.

## 22 **Introduction**

23 The inferior colliculus (IC) is the hub of the central auditory pathway. Nearly all ascending output from  
24 the lower auditory brainstem and a large descending projection from the auditory cortex converge in  
25 the IC (Adams, 1979; Glendenning and Masterton, 1983; Oliver, 1987, 1984; Winer et al., 1998). In turn,  
26 the IC provides the main auditory input to the thalamocortical system (Calford and Aitkin, 1983).  
27 Neurons in the IC exhibit selective responses to the spectral and temporal content of sounds and  
28 perform computations important for sound localization and the identification of speech and other  
29 communication sounds (Felix et al., 2018; Winer and Schreiner, 2005). Despite these critical functions,  
30 we have limited knowledge about the organization and function of neural circuits in the IC. This is  
31 because probing neural circuits requires the ability to identify and manipulate specific classes of  
32 neurons, but IC neurons have proven difficult to delineate into distinct classes.

33 Anatomical studies have shown that IC neurons have disc-shaped or stellate morphologies  
34 (Malmierca et al., 1993; Meininger et al., 1986; Oliver and Morest, 1984). Disc-shaped neurons maintain  
35 their dendritic arbors within isofrequency lamina and make up the majority of neurons in the  
36 tonotopically organized central nucleus of the IC (ICc). Stellate neurons in the ICc extend their dendritic  
37 arbors across lamina and are therefore thought to integrate information across sound frequencies  
38 (Oliver et al., 1991). Both disc-shaped and stellate cells can be glutamatergic or GABAergic, an indication  
39 that each of these morphological groups consists of at least two neuron types (Oliver et al., 1994). Based  
40 on soma size and extracellular markers, IC GABAergic neurons have been divided into four classes  
41 (Beebe et al., 2016). Among these, “large GABAergic” neurons are the one consistently identified neuron  
42 type in the IC (Geis and Borst, 2013; Ito et al., 2015, 2009; Ito and Oliver, 2012). However, there are  
43 currently no known molecular markers specific for large GABAergic neurons (Schofield and Beebe,  
44 2018).

45           Defining IC neuron types based on physiology has also proven difficult. IC neurons exhibit  
46   diverse responses to tones, but a comprehensive study showed that these responses form a continuum  
47   and cannot be used on their own to define functionally significant groups of neurons (Palmer et al.,  
48   2013). In addition, disc-shaped neurons could not be divided into distinct groups by matching their  
49   morphology with their in vivo physiology (Wallace et al., 2012). Similarly, GABAergic and glutamatergic  
50   IC neurons exhibit overlapping and equally diverse responses to sounds (Ono et al., 2017). In vitro  
51   recordings have shown that IC neurons exhibit diverse firing patterns, but these firing patterns do not  
52   correlate with neuronal morphology or neurotransmitter phenotype (Ono et al., 2005; Peruzzi et al.,  
53   2000; Reetz and Ehret, 1999; Sivaramakrishnan and Oliver, 2001).

54           In many brain regions, a multidimensional analysis that includes molecular markers has proven  
55   key to identifying neuron classes (Petilla Interneuron Nomenclature Group et al., 2008; Tremblay et al.,  
56   2016; Zeng and Sanes, 2017). Here, by combining molecular, morphological, and physiological analyses,  
57   we identify vasoactive intestinal peptide (VIP) neurons as a novel class of IC principal neurons. Our  
58   results show that VIP neurons are glutamatergic stellate neurons, are present in the major subdivisions  
59   of the IC, and are labeled in the VIP-IRES-Cre mouse line. Using viral tract tracing, we found that VIP  
60   neurons project to multiple auditory and non-auditory areas, demonstrating that a single neuron class  
61   can participate in most of the major projection pathways out of the IC. Using Channelrhodopsin-assisted  
62   circuit mapping (CRACM), we found that VIP neurons integrate input from the contralateral IC and the  
63   auditory brainstem. Input from the auditory brainstem also drove local, feedforward inhibition onto VIP  
64   neurons. Thus, our data reveal a novel circuit motif that may control the temporal summation of  
65   ascending input to the IC. Together, these results represent a critical step toward determining how  
66   defined neural circuits in the IC support sound processing.



## 67 Results

### 68 The VIP-IRES-Cre mouse line labels neurons in multiple subdivisions of the IC

69 By crossing VIP-IRES-Cre mice with Ai14 reporter mice, we obtained mice in which VIP<sup>+</sup> neurons  
70 expressed the fluorescent protein tdTomato. VIP<sup>+</sup> neurons in these animals were visible in numerous  
71 brain regions; the present report focuses on the IC. **Figure 1** shows the distribution of VIP<sup>+</sup> neurons  
72 (magenta) in transverse sections through the IC. Labeled neurons were present throughout most of the  
73 rostro-caudal extent of the IC, but were most numerous in the caudal regions. Labeled neurons were  
74 rare or absent in the IC rostral pole and intercollicular tegmentum.

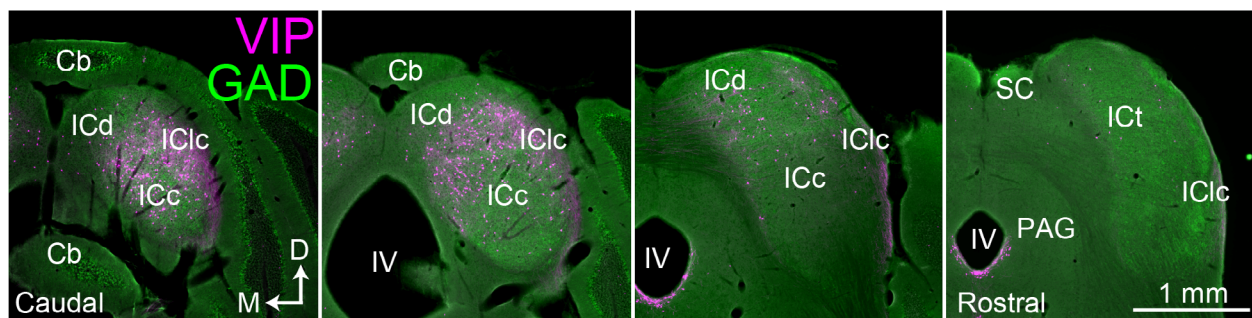

75 **Figure 1. VIP neurons are distributed across multiple subdivisions of the IC.** Photomicrographs of transverse sections through the IC ranging from caudal (left-most) to rostral (right-most). VIP-expressing cells (labeled with tdTomato) are shown in magenta, and GAD67 staining is shown in green to show the border of the IC. VIP-expressing cells are present in multiple subdivisions of the IC, but are most prominent in caudal and dorsal parts of the IC. Scale = 1 mm. Cb (cerebellum), ICc, ICd, IClc (central nucleus, dorsal cortex and lateral cortex of the inferior colliculus), ICt (intercollicular tegmentum), IV (fourth ventricle), PAG (periaqueductal gray).

### 76 VIP neurons are glutamatergic and represent 1.8% of IC neurons

77 Previous studies have shown that IC neurons are either glutamatergic or GABAergic (Merchán et al.,  
78 2005; Oliver et al., 1994). To investigate the neurotransmitter content of VIP neurons, we performed  
79 immunohistochemical staining against GAD67, a marker for GABAergic neurons, in brain slices from  
80 three VIP-IRES-Cre x Ai14 animals, aged P58 (**Figure 2A**). We then counted tdTomato<sup>+</sup> neurons and  
81 GAD67-labeled cell bodies in one caudal and one rostral IC slice per animal. Neurons located in the ICc,  
82 ICd, and IClc were combined for this analysis. Across 793 tdTomato<sup>+</sup> neurons, only 10 neurons co-

**Table 1. VIP neurons are glutamatergic.** Across three mice, an average of 1.3% of tdTomato<sup>+</sup> neurons were labeled with an antibody against GAD67.

| Animal                                   | Slice #      | # tdTomato <sup>+</sup> | # GAD67 <sup>+</sup> | # co-labeled | % tdTomato <sup>+</sup> co-labeled |
|------------------------------------------|--------------|-------------------------|----------------------|--------------|------------------------------------|
| P58 female, #1                           | 1 (caudal)   | 210                     | 184                  | 3            | 1.4                                |
|                                          | 2 (middle)   | 172                     | 65                   | 2            | 1.2                                |
|                                          | <b>Total</b> | <b>382</b>              | <b>249</b>           | <b>5</b>     | <b>1.3</b>                         |
| P58 male                                 | 1 (caudal)   | 151                     | 152                  | 2            | 1.3                                |
|                                          | 2 (middle)   | 46                      | 212                  | 2            | 4.3                                |
|                                          | <b>Total</b> | <b>197</b>              | <b>364</b>           | <b>4</b>     | <b>2.0</b>                         |
| P58 female, #2                           | 1 (caudal)   | 161                     | 137                  | 0            | 0.0                                |
|                                          | 2 (middle)   | 53                      | 187                  | 1            | 1.9                                |
|                                          | <b>Total</b> | <b>214</b>              | <b>324</b>           | <b>1</b>     | <b>0.5</b>                         |
| <b>Grand total</b>                       |              | <b>793</b>              | <b>937</b>           | <b>10</b>    | <b>1.3</b>                         |
| <b>Average across 3 mice (mean ± SD)</b> |              |                         |                      |              | <b>1.3 ± 0.8%</b>                  |

83 labeled with GAD67 (1.3%, **Table 1**). These data suggest that VIP neurons are a subgroup of  
 84 glutamatergic neurons in the IC.

85 To determine the percentage of IC neurons that are VIP neurons, we performed immunostaining  
 86 with anti-NeuN, a neuron-selective antibody previously shown to label most or all neurons in the IC  
 87 (Beebe et al., 2016; Foster et al., 2014; Mellott et al., 2014) (**Figure 2B**). Coronal IC sections from two  
 88 VIP-IRES-Cres x Ai14 mice were stained, and three sections per mouse were analyzed: one caudal, one  
 89 middle, and one rostral. To ensure unbiased counting of neurons, we applied the optical fractionator  
 90 method, a design-based stereology approach (see Materials and Methods; West et al., 1991). The ICc,  
 91 ICd, and ICi were combined for this analysis. Accordingly, we used systematic random sampling to  
 92 collect confocal image stacks at evenly spaced intervals from each IC section. Each image stack was  
 93 inspected to determine the boundaries of the slice, and guard zones were set at the top and bottom of  
 94 the slice to delineate a central, 15 μm-thick section of the slice for subsequent analysis. Within this 15

95  $\mu\text{m}$ -thick region, we separately marked NeuN<sup>+</sup> neurons and tdTomato<sup>+</sup> neurons, then overlaid the NeuN  
96 and tdTomato images to determine the number of double-marked cells. Across six slices from 2 mice,  
97 we found that 1.8% of neurons in the mouse IC are VIP neurons (205 of 11,175 neurons counted,  
98 **Table 2**).

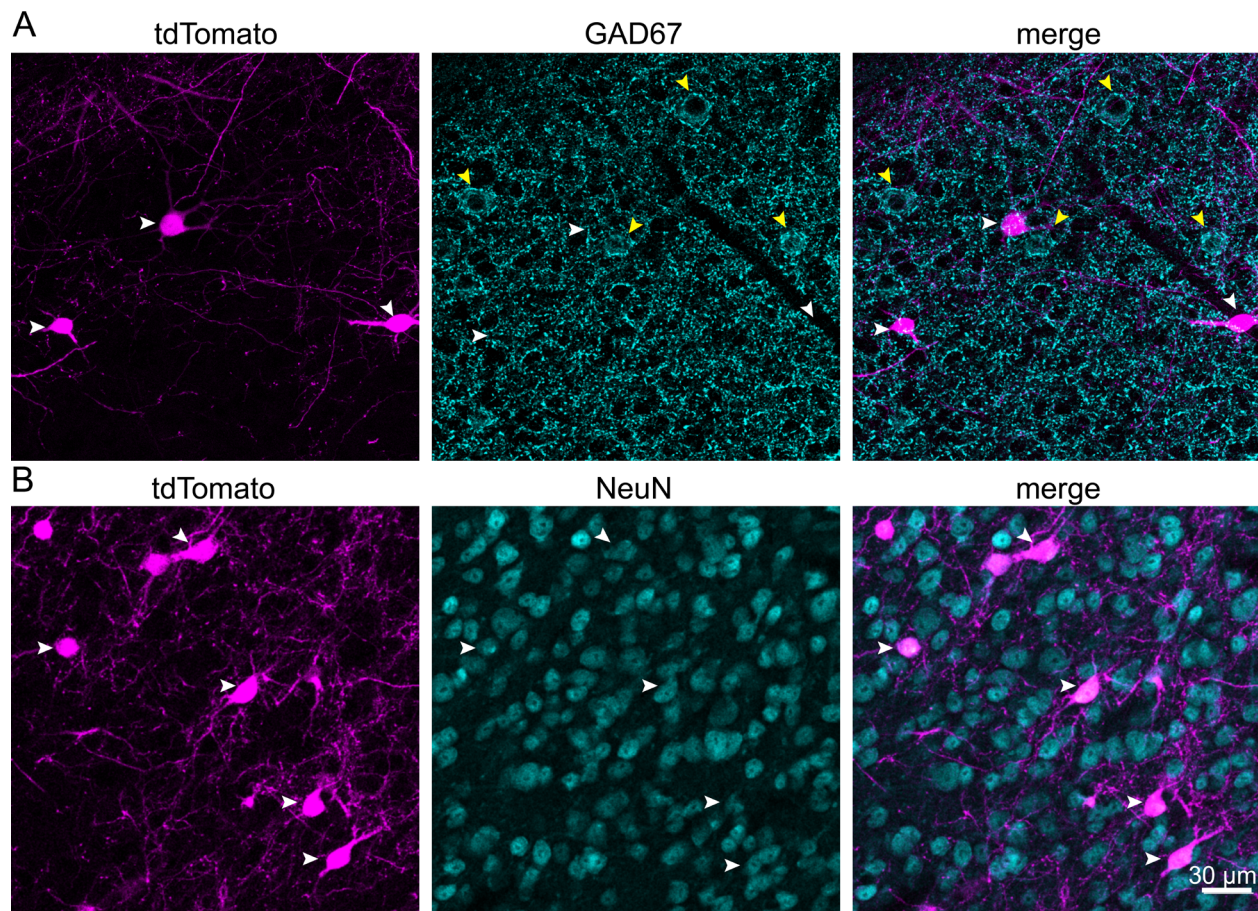

99

**Figure 2. VIP neurons are glutamatergic and represent 1.8% of the total neuronal population in the IC. (A)** Confocal z-stack projections showing IC VIP neurons (magenta, left), GAD67 staining (cyan, middle), and an overlay (right). White arrowheads mark VIP neurons, yellow arrowheads GABAergic cell bodies. There was virtually no overlap between VIP neurons and GABAergic neurons (right). **(B)** Confocal z-stack projections showing VIP neurons (magenta, left), NeuN staining (cyan, middle), and an overlay (right). White arrowheads mark VIP neurons labeled by NeuN. Scale bar applies to A and B.

100

**Table 2. VIP neurons represent 1.8% of the total population of IC neurons.** Table shows results from stereological analysis of the percentage of IC neurons (NeuN<sup>+</sup>) that express tdTomato in VIP-IRES-Cre x Ai14 mice. Values indicate mean  $\pm$  SEM, (#tdTomato<sup>+</sup> neurons /#NeuN<sup>+</sup> neurons), and number of systematic random samples analyzed from each slice.

| Slice plane      | P58 male                                   | P80 female                                 | Per slice plane               | Grand Average                   |
|------------------|--------------------------------------------|--------------------------------------------|-------------------------------|---------------------------------|
| <b>Caudal</b>    | 1.9 $\pm$ 0.8 %<br>(26/1356)<br>6 samples  | 2.8 $\pm$ 0.9 %<br>(67/2381)<br>14 samples | 2.4 $\pm$ 0.4 %<br>(93/3737)  |                                 |
| <b>Middle</b>    | 0.9 $\pm$ 0.3 %<br>(12/1389)<br>10 samples | 1.9 $\pm$ 0.6 %<br>(34/1825)<br>9 samples  | 1.4 $\pm$ 0.5 %<br>(46/3214)  |                                 |
| <b>Rostral</b>   | 1.6 $\pm$ 0.4 %<br>(30/1887)<br>10 samples | 1.5 $\pm$ 0.3 %<br>(36/2337)<br>16 samples | 1.6 $\pm$ 0.02 %<br>(66/4224) |                                 |
| <b>Per mouse</b> | 1.5 $\pm$ 0.3 %<br>(68/4632)               | 2.1 $\pm$ 0.4 %<br>(137/6543)              |                               | 1.8 $\pm$ 0.3 %<br>(205/11,175) |

101 **VIP neurons exhibit sustained firing patterns and their intrinsic physiology varies along**  
102 **the tonotopic axis of the ICc**

103 Next, we investigated the firing pattern and intrinsic physiology of VIP neurons by targeting whole cell  
104 patch clamp recordings to tdTomato<sup>+</sup> neurons in brain slices from VIP-IRES-Cre x Ai14 mice. Recordings  
105 made from the ICc, ICd, and IClc were lumped together for this experiment because there were no clear  
106 differences in VIP neuron physiology across these subdivisions of the IC. VIP neurons had a resting  
107 membrane potential of  $-69.5 \text{ mV} \pm 4.4 \text{ mV}$  ( $n = 216$ , corrected for liquid junction potential). In response  
108 to a current step protocol with hyperpolarizing and depolarizing current injections, VIP neurons showed  
109 minimal to no voltage sag to hyperpolarizing current steps and a sustained firing pattern of action  
110 potentials to depolarizing current steps (**Figure 3A<sub>1</sub>, A<sub>2</sub>**). Neurons were classified as sustained if their  
111 spike frequency adaptation ratio (SFA) was less than 2 (Peruzzi et al., 2000). The SFA ratio was calculated  
112 by dividing the last interspike interval by the first for a depolarizing current step that elicited  $\sim 10$  spikes.  
113 90.3% (214 of 237) of patched VIP neurons exhibited a sustained firing pattern, 8.4% (20 of 237) showed



114 an adapting firing pattern (SFA ratio  $\geq 2$ ), and 1.3% (3 of 237) of VIP neurons had a strongly adapting  
 115 firing pattern (firing stopped before the end of the current step).

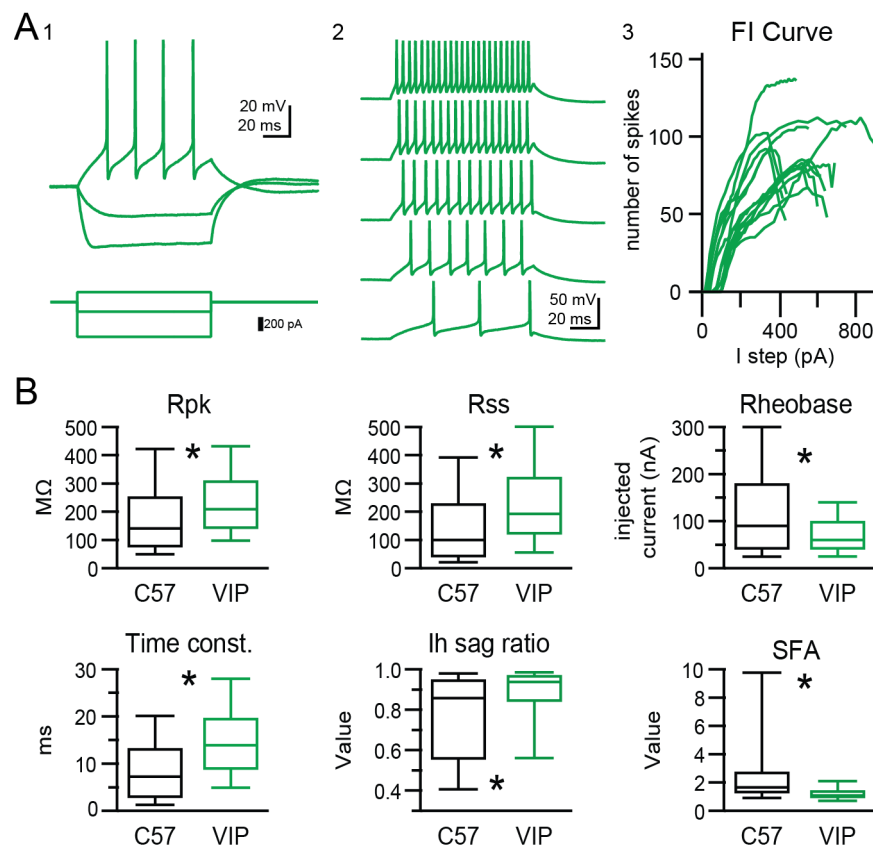

**Figure 3. VIP neurons have sustained firing patterns and moderate membrane properties.** (A) VIP neurons exhibited a regular, sustained firing pattern in response to depolarizing current steps, while hyperpolarizing current steps elicited minimal voltage sag (A1). As the amplitude of depolarizing current steps was increased, VIP neurons increased their firing rate while keeping their sustained firing pattern (A2). Example firing versus input (FI) curves from 15 VIP neurons show that firing rate increased in a mostly linear fashion over a broad range of current step amplitudes (A3). (B) Intrinsic physiology of VIP neurons is statistically different from the general population of IC neurons for all parameters tested. On average, VIP neurons had a significantly higher peak input resistance ( $R_{pk}$ ) and steady-state input resistance ( $R_{ss}$ ), a lower rheobase, a longer membrane time constant, a smaller and less variable voltage sag ( $I_h$ ) at -91 mV, and a markedly small and highly invariable spike frequency adaptation ratio (SFA). Boxplots show median, 25<sup>th</sup> and 75<sup>th</sup> percentile (box), and 9<sup>th</sup> and 91<sup>th</sup> percentile (whiskers).

116 To compare the physiology of VIP neurons to that of the general population of neurons in the IC,  
 117 we patched neurons in IC slices of C57BL/6J mice in a random, non-targeted approach as a control.  
 118 Neurons patched with the non-targeted (NT) approach showed a higher diversity in firing patterns, with  
 119 a higher proportion of strongly adapting neurons (21.8%, 12 out of 55) and adapting neurons (16.4%, 9  
 120 out of 55) when compared to VIP neurons. Sustained firing neurons were the most prevalent group in

121 NT recordings (58.2%, 32 out of 55). Additionally, 3.6% (2 of 55) of randomly patched IC neurons fired  
122 only 1 spike at the onset of the depolarizing current step. This firing pattern was never observed in VIP  
123 neurons. The intrinsic physiology of VIP neurons also differed significantly from the general population  
124 of IC neurons (see **Figure 3B**). VIP neurons on average had a higher peak input resistance ( $R_{pk}$ ) than non-  
125 targeted neurons (mean  $\pm$  SD: VIP  $242.1 \pm 139.4$  M $\Omega$  vs NT  $191.1 \pm 161.4$  M $\Omega$ ,  $p=0.0003$ , Wilcoxon rank  
126 sum test), a higher steady-state input resistance ( $R_{ss}$ ) (mean  $\pm$  SD: VIP  $239.7 \pm 170.7$  M $\Omega$  vs NT  $153.4 \pm$   
127  $153.2$ ,  $p = 0.0001$ , Wilcoxon rank sum test), a slower membrane time constant (mean  $\pm$  SD: VIP  $15.0 \pm$   
128  $8.8$  ms vs NT  $9.7 \pm 7.6$  M $\Omega$ ,  $p = 6.8 \cdot 10^{-7}$ , Wilcoxon rank sum test), lower rheobase values (mean  $\pm$  SD: VIP  
129  $67.8 \pm 96.2$  pA vs NT  $120.0 \pm 100.9$  pA,  $p = 0.013$ , Wilcoxon rank sum test), and a much less pronounced  
130 voltage sag (mean  $\pm$  SD: VIP  $0.87 \pm 0.16$  vs NT  $0.75 \pm 0.21$ ,  $p = 0.0003$ , Wilcoxon rank sum test). Most  
131 striking, the SFA ratio of VIP neurons was tightly clustered at  $1.47 \pm 1.62$ , whereas SFA of NT neurons  
132 showed a significantly higher value and spread ( $3.62 \pm 5.43$ , mean  $\pm$  SD,  $p = 2.07 \cdot 10^{-7}$ ).

133         Although statistically different from the general neuronal population in the IC and showing a  
134 tightly clustered SFA ratio, the intrinsic physiology of VIP neurons still showed some level of variability.  
135 In the lower auditory brainstem, it has been found that the intrinsic physiology of some neurons varies  
136 along the tonotopic axis (Baumann et al., 2013; Hassfurth et al., 2009). We therefore hypothesized that  
137 the intrinsic physiology of VIP neurons in the ICc varied along the tonotopic axis of the ICc. During patch  
138 clamp experiments, VIP neurons were passively filled with biocytin via the internal solution. Slices were  
139 fixed and stained post hoc with a streptavidin-Alexa Fluor conjugate (see Materials and Methods). We  
140 then used confocal imaging to map the location of the recorded neurons relative to a two-dimensional  
141 (medial-lateral and dorsal-ventral) coordinate system superimposed on the left IC ( $n = 61$  neurons;  
142 **Figure 4A**). Correlations between intrinsic physiology and location in the ICc were tested by fitting a  
143 plane to scatter plots of intrinsic parameters versus medial-lateral and dorsal-ventral coordinates

144 **(Figure 4B)**. Because the ICd and ICc are not tonotopically organized, only neurons located in the ICc  
 145 were included in this analysis.

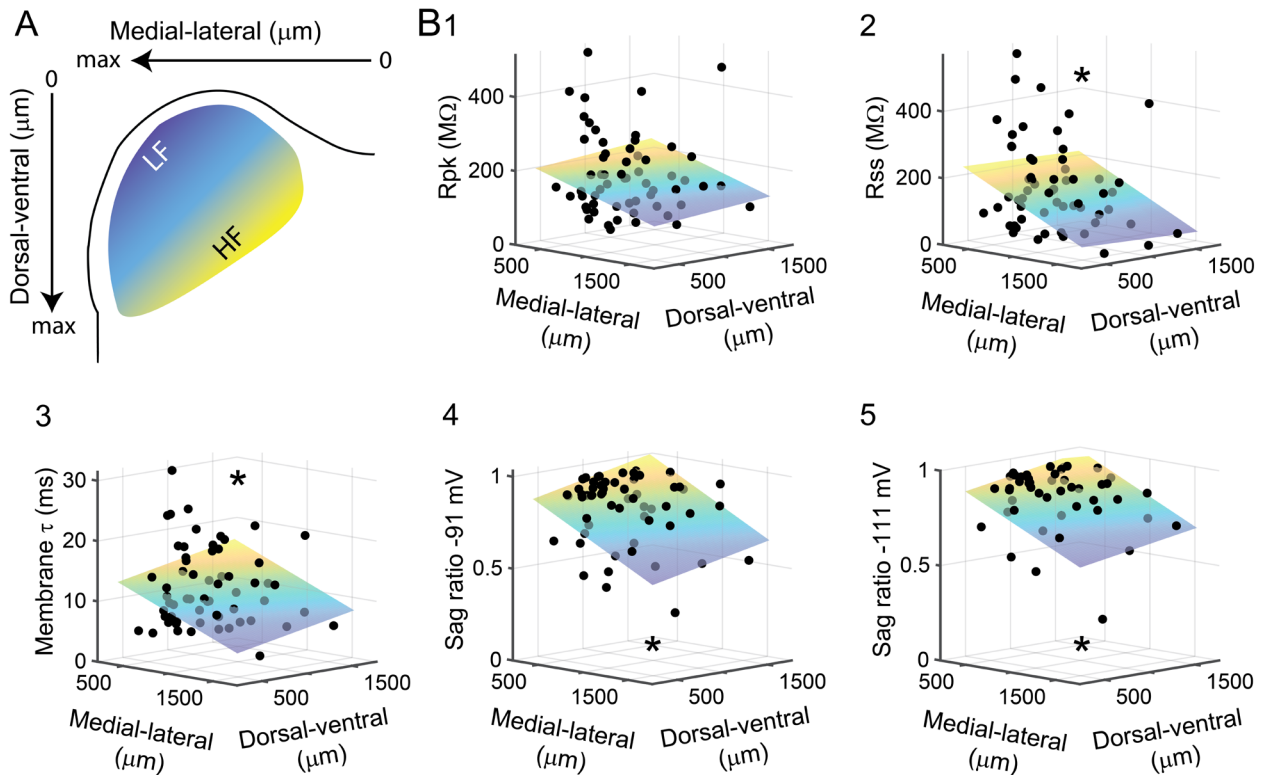

146

**Figure 4. Intrinsic physiology of VIP neurons in the ICc varies along the tonotopic axis. (A)** A 2D coordinate system was fit to every IC slice a VIP neuron was recorded from. The medial-lateral axis runs from the midline (zero) to the lateral edge (max) of the slice, the dorsal-ventral axis from the dorsal edge of the slice (zero) to the ventral border of the IC (max). For illustrative purposes, the approximate position along the tonotopic axis of the ICc is color-coded from blue (low frequency) to yellow (high frequency). **(B)** Correlation of measured intrinsic parameters with recording location. Black dots represent physiological parameters of individual VIP neurons (z-axis, left) mapped to their recording location (x- and y-axes, bottom). Planes show Levenberg-Marquardt least squares fits, color-coded from low z-axis values (blue) to high z-axis values (yellow). Asterisks indicate statistical significance of fit.

147 We found that variability in the intrinsic physiology of VIP neurons was at least partially  
 148 correlated to their location within the coronal plane of the ICc. This was particularly true for the voltage  
 149 sag ratios, which measure hyperpolarization-activated cation current ( $I_h$ ). Approximately one quarter of  
 150 the variability in sag ratios was explained by location in the ICc (sag ratio at -91 mV:  $R = 0.536$ ,  $R^2_{adj} =$   
 151  $0.262$ ,  $p = 1.24 \times 10^{-05}$ ,  $n = 60$ , **Figure 4B<sub>4</sub>**; sag ratio at -111 mV:  $R = 0.516$ ,  $R^2_{adj} = 0.233$ ,  $p = 0.0002$ ,  $n =$   
 152  $47$ , **Figure 4B<sub>5</sub>**). A significant but smaller portion of the variability in membrane time constant was  
 153 explained by location in the ICc ( $\tau$ :  $R = 0.343$ ,  $R^2_{adj} = 0.088$ ,  $p = 0.007$ ,  $n = 61$ ; **Figure 4B<sub>3</sub>**). There was also

154 a significant relationship between the steady-state input resistance of VIP neurons and location in the  
155 ICc and a trend toward a relationship between peak input resistance and location ( $R_{ss}$ :  $R = 0.328$ ,  $R^2_{adj} =$   
156  $0.076$ ,  $p = 0.011$ ,  $n = 60$ ;  $R_{pk}$ :  $R = 0.227$ ,  $R^2_{adj} = 0.018$ ,  $p = 0.084$ ,  $n = 60$ ; **Figure 4B<sub>1,2</sub>**). The tonotopic axis of  
157 the ICc runs along a dorsolateral (low frequency) to ventromedial (high frequency) axis (Malmierca et al.,  
158 2008; Portfors et al., 2011; Stiebler and Ehret, 1985; Willott and Urban, 1978). For each of the above  
159 intrinsic parameters, values tended to be lower, indicating faster membrane properties, at more  
160 dorsolateral locations and higher, indicating slower membrane properties, at more ventromedial  
161 locations. Combined, these results suggest that variability in the intrinsic physiology of VIP neurons is at  
162 least in part due to their localization along the tonotopic axis of the ICc and that the membrane  
163 properties of VIP neurons tend to be faster in lower frequency regions of the ICc.

#### 164 **VIP neurons have stellate morphology and dendritic spines**

165 The streptavidin staining of biocytin-filled VIP neurons allowed for a detailed analysis of morphology. In  
166 total, we recovered the morphology of 55% of patched VIP neurons ( $n = 100$  of 183). Nearly all ( $81/86 =$   
167  $94.2\%$ ) VIP neurons had spiny dendrites (**Figure 5A, B insets**). This contrasts sharply with the 28% (12 of  
168 43 neurons) of neurons that had spiny dendrites in non-targeted recordings from C57BL/6J mice (**Figure**  
169 **5C**), suggesting that VIP neurons represent a subset of IC cells. Nonetheless, dendritic spines can be  
170 present on a variety of cell types, including stellate and disc-shaped cells (Herrera et al., 1988; Paloff et  
171 al., 1992; Willard and Ryugo, 1983). On average, VIP neurons had 5 primary dendrites (mean  $\pm$  SD:  $4.77 \pm$   
172  $1.38$ ) that spread out in all directions from the soma, consistent with a stellate morphology. This is  
173 unsurprising in the ICd and ICc, where stellate morphology predominates, but warranted further  
174 analysis in the ICc, where stellate cells can have oriented dendritic trees but are outnumbered by the



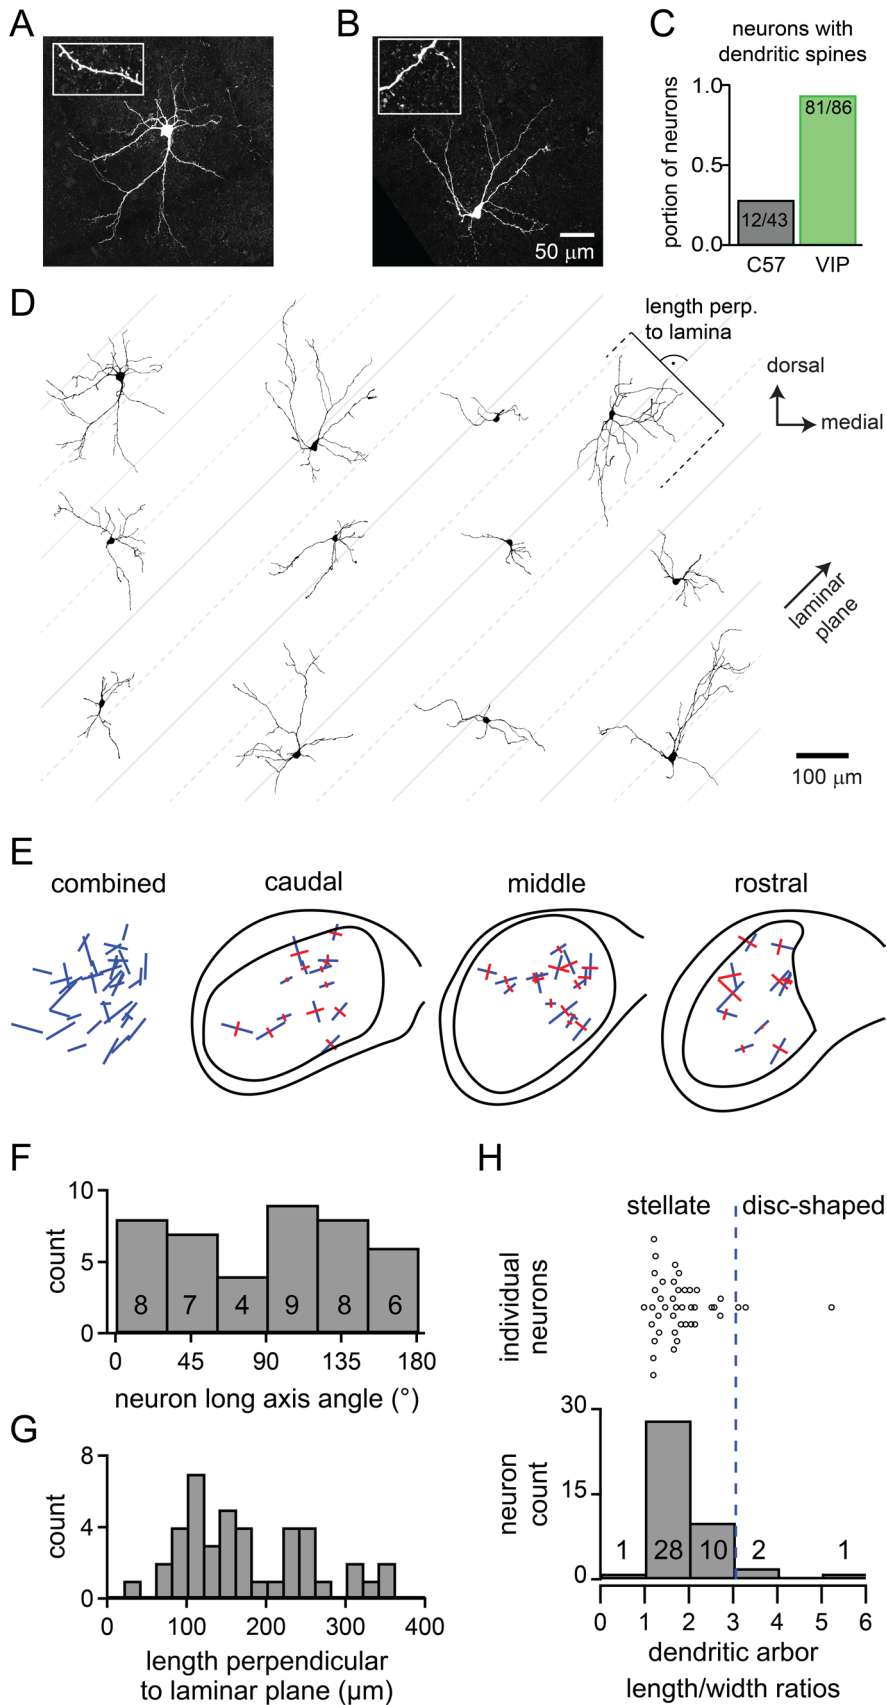

**Figure 5. VIP neurons in the ICc are a class of stellate cells and most VIP neurons have dendritic spines. (A, B)** Maximum-intensity projections of confocal z-stacks showing streptavidin-Alexa Fluor-stained VIP neurons from the ICc. Insets: enlarged views of dendritic segments show dendritic spines. **(C)** 94% of VIP neurons across all IC subdivisions had spiny dendrites vs 28% of neurons from non-targeted recordings in C57BL/6J animals. **(D)** Representative reconstructions of the morphology of 12 VIP neurons from the ICc. Neurons are oriented as if in the left ICc. Gray lines were drawn at a 45° angle to illustrate the general orientation of the laminae. Solid gray lines are spaced 200 μm apart, dashed lines and solid lines are spaced 100 μm apart. **(E)** Orientation of the dendritic fields of VIP neurons from the ICc. Combined: Orientation of all reconstructed VIP neurons from the ICc (n = 42). Blue lines denote the orientation of the longest axis (first principal direction) found for each neuron using 2D PCA. Caudal, middle, rostral: Orientation of dendritic fields separated according to position along the rostro-caudal axis of the ICc. Blue lines show longest axis, perpendicular red lines show second longest axis (second principal direction) of each neuron as defined by 2D PCA. **(F)** Angular orientation of the long axis for every reconstructed VIP neuron within the ICc. Angles indicate counter-clockwise rotation relative to the medial-lateral (horizontal) axis. **(G)** Spread of the dendritic arbors of ICc VIP neurons measured perpendicular to a predicted 45° isofrequency plane. The dendrites of 83% of VIP neurons extended more than 100 μm across the laminar plane. **(H)** Dendritic arbor length to width ratio for all reconstructed VIP neurons from the ICc (n = 42). 93% of VIP neurons had a length to width ratio < 3, indicating that they are stellate cells. The orientation of length and width axes was determined using 3D PCA.

176 more highly oriented disc-shaped cells (Malmierca et al., 1993; Oliver and Morest, 1984; Willard and  
177 Ryugo, 1983).

178 **Figure 5D** shows the variability in the morphology of VIP neurons located in the ICc. Neurons are  
179 displayed as they would appear in a coronal slice of the left IC viewed from a caudal perspective. Oliver  
180 and colleagues distinguished disc-shaped from stellate neurons by calculating the length to width ratio  
181 of the dendritic arbor: neurons with a ratio <3 were stellate and those with a ratio ≥3 were disc-shaped  
182 (Oliver et al., 1991). Applying this classification to our sample, 93% of VIP neurons in the ICc (39 of 42  
183 neurons) had a length to width ratio <3, therefore being classified as stellate (**Figure 5H**). Only three VIP  
184 neurons from the ICc had a length to width ratio >3. These results demonstrate that the dendritic arbors  
185 of VIP neurons are not as highly oriented as disc-shaped neurons, again consistent with the hypothesis  
186 that VIP neurons are a class of stellate neurons.

187 Although less oriented than disc-shaped cells, the VIP dendrites tended to show some  
188 orientation that could influence the range of frequencies that converge on the cell. To measure the  
189 orientation of ICc VIP neurons in relation to the isofrequency laminae, which in mouse run in a ~45°  
190 angle through the ICc (Stiebler and Ehret, 1985), we identified the longest and second longest axis of

191 each neuron through principal component analysis and plotted the orientation of these axes on a  
192 standardized model of the IC (**Figure 5E**). No preferred orientation was apparent (**Figure 5E, combined**).  
193 Only 17% of VIP neurons (7 of 42) had their longest axis oriented within  $\pm 15^\circ$  of the  $45^\circ$  laminar plane,  
194 indicating that the dendritic arbors of most VIP neurons (83%, 35 of 42) may be positioned to cross one  
195 or more isofrequency laminae in the ICc (**Figure 5F**). To quantify this, we calculated the length the  
196 dendritic arbor extended perpendicular to a  $45^\circ$  laminar plane. The dendritic arbors of 83% of ICc VIP  
197 neurons (35 of 42) spread more than 100  $\mu\text{m}$  perpendicular to the laminar plane, and more than 36%  
198 (15 of 42) spread more than 200  $\mu\text{m}$  across the laminar plane (**Figure 5G**). Previous work in rats has  
199 shown that the isofrequency laminae have a center-to-center distance that ranges from 90 – 150  $\mu\text{m}$ ,  
200 while neurons contained within a lamina had a thickness ranging from 30 – 70  $\mu\text{m}$  (Malmierca et al.,  
201 1993). If we assume that laminar dimensions in mouse are no thicker than those in rats, our results  
202 indicate that the dendritic fields of VIP neurons usually extend beyond at least one isofrequency lamina,  
203 consistent with the conclusion that VIP neurons in the ICc are a class of stellate neurons.

#### 204 **VIP neurons project to targets within and beyond the IC**

205 Injections of an AAV encoding a Cre-dependent eGFP construct, AAV1.CAG.FLEX.eGFP.WPRE.bGH, led to  
206 eGFP expression in VIP<sup>+</sup> IC cells. **Figure 6A** shows a representative deposit site, with eGFP-positive  
207 neurons (yellow) located among a population of VIP<sup>+</sup> cells (magenta, labeled by cross-breeding the VIP-  
208 IRES-Cre mice with Ai14 reporter mice). Neurons that expressed eGFP routinely co-expressed tdTomato,  
209 confirming VIP expression by those neurons (**Figure 6B**). Many tdTomato<sup>+</sup> neurons did not express the  
210 eGFP, despite their intermingling with many virally-labeled neurons. eGFP-labeled axons were  
211 prominent within the injected IC, where the labeled boutons were located in the neuropil or in close  
212 apposition to IC somas, suggesting extensive contributions to local circuits (**Figure 6C**). In addition, eGFP-  
213 labeled axons were present in several fiber tracts carrying projections from the IC, including the  
214 brachium of the IC, the commissure of the IC and the lateral lemniscus. Labeled axons and boutons were

215 found in numerous auditory nuclei, including the contralateral IC, medial geniculate body and superior  
216 olivary complex (**Figure 6D-F**). Additional targets included the nucleus of the brachium of the IC, the  
217 periaqueductal gray, and the superior colliculus (not shown; details of termination patterns and terminal  
218 axon morphology will be described in a subsequent report). These data indicate that VIP<sup>+</sup> IC neurons  
219 contribute to ascending, commissural and descending pathways from the IC.

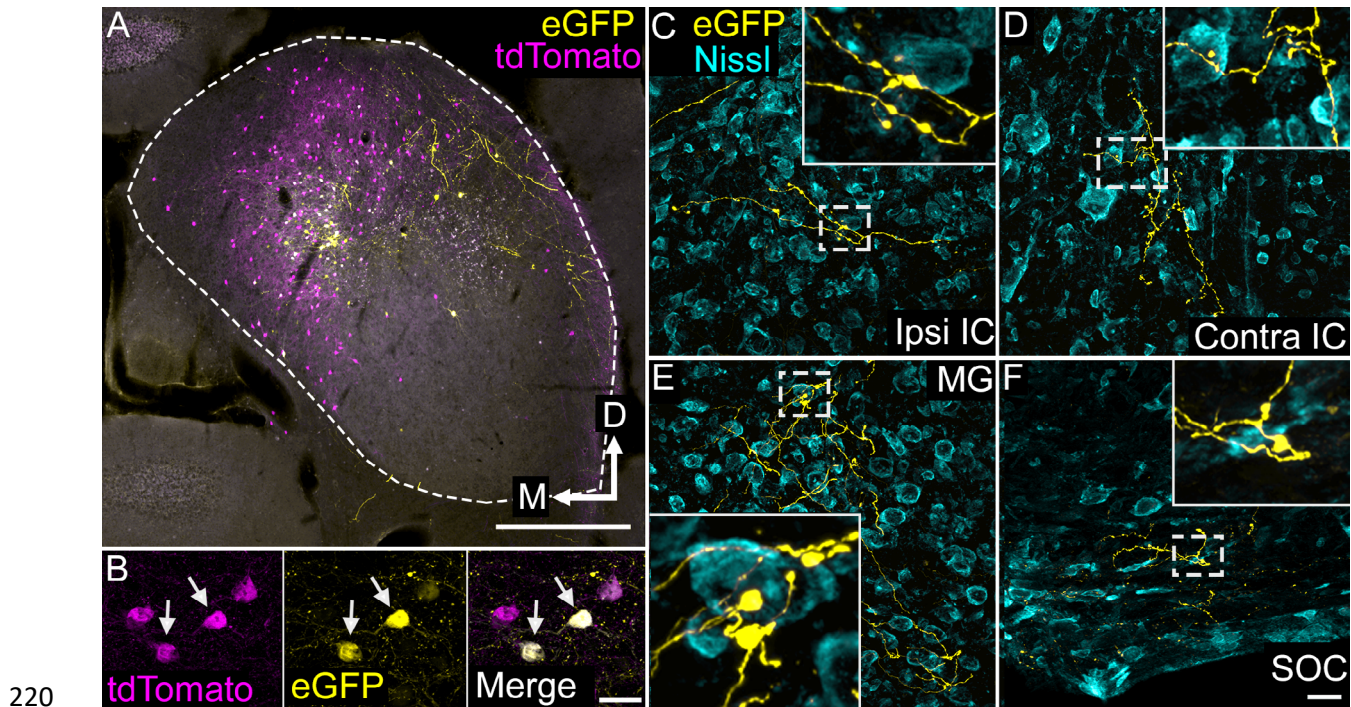

**Figure 6. VIP neurons project to multiple local and long-range targets. (A)** Photomicrograph of an AAV deposit site in the right IC. AAV-infected, VIP-expressing cells are labeled with eGFP (yellow), while all VIP-expressing cells are labeled with tdTomato (magenta). Cells expressing both fluorescent proteins appear white. Scale = 500  $\mu$ m. **(B)** High magnification photomicrographs showing labeled cells in the AAV deposit site. The field shows four tdTomato-expressing cells (magenta), two of which (white arrows) were also AAV-infected and expressed eGFP (yellow). Scale = 20  $\mu$ m. **(C-F)** High magnification photomicrographs showing eGFP-labeled collicular axons (yellow) terminating in the ipsilateral IC (C), the contralateral IC (D), the medial geniculate body (E), or the ventral nucleus of the trapezoid body in the superior olivary complex (F) after an AAV injection in the IC. The white dashed box in each image identifies an area enlarged in the inset to show details of labeled axons and boutons. A fluorescent Nissl stain (cyan) shows that boutons are located in close association with cell bodies as well as in the intervening neuropil. Scale = 20  $\mu$ m

## 221 **VIP neurons in the ICc receive excitatory and inhibitory synaptic input from the contralateral IC**

222 In addition to axonal projection patterns, the sources of synaptic input to a neuron class are an  
223 important predictor of neuronal function. Anatomical studies have shown that the IC receives

224 ascending, descending, and commissural input, but, with the exception of large GABAergic neurons (Ito  
225 et al., 2015; Ito and Oliver, 2014), it has rarely been possible to identify the sources and physiology of  
226 synaptic input to a specific class of neurons in the IC. This is largely because axons from multiple sources  
227 overlap in the IC, making it difficult to use electrical stimulation to selectively activate axons from  
228 specific presynaptic sources. To overcome this obstacle, we turned to Channelrhodopsin-assisted circuit  
229 mapping (CRACM) (Petreanu et al., 2007). With CRACM, it is possible to selectively activate a single  
230 population of presynaptic neurons by anatomically and/or molecularly restricting the expression of an  
231 optogenetic protein.

232 Numerically, the contralateral IC provides the largest single source of input to the IC (Moore,  
233 1988). We therefore first used CRACM to test whether VIP neurons in the ICc receive commissural input.  
234 Using stereotaxic, intracranial virus injections with AAV1.Syn.Chronos-GFP.WPRE.bGH, we drove  
235 expression of GFP-tagged Chronos, a fast Channelrhodopsin variant (Klapoetke et al., 2014), in the right  
236 IC. We then targeted recordings to VIP neurons in the contralateral (left) ICc (**Figure 7A**). In each  
237 experiment, we used GFP fluorescence to verify transfection of the right IC (**Figure 7B**) and restricted  
238 our recordings to VIP neurons in areas of the left ICc where GFP-labelled axons were visible. Because  
239 commissural projections are a mixture of glutamatergic and GABAergic projections (González-Hernández  
240 et al., 1996; Hernández et al., 2006; Nakamoto et al., 2013; Saint Marie, 1996), we used pharmacology  
241 to isolate EPSPs and IPSPs. Indeed, without adding receptor antagonists to the bath, postsynaptic  
242 potentials often were mixtures of IPSPs and EPSPs (data not shown). In the presence of AMPA and  
243 NMDA receptor antagonists (10  $\mu$ M NBQX and 50  $\mu$ M D-AP5, bath application), 2 – 5 ms flashes of blue  
244 light elicited IPSPs in 6 out of 12 neurons tested (**Figure 7C, left**). IPSPs were completely abolished by the  
245 GABA<sub>A</sub> receptor antagonist gabazine (5  $\mu$ M, **Figure 7C, right**; n = 6; amplitude, p = 0.006; rise time, p =  
246 0.003; halfwidth, p = 0.001; membrane time constant, p = 0.003, paired t-test). On average (n = 6),  
247 commissural IPSPs in ICc VIP neurons were small (-1.53 mV  $\pm$  0.96 mV) and had moderate 10 – 90% rise



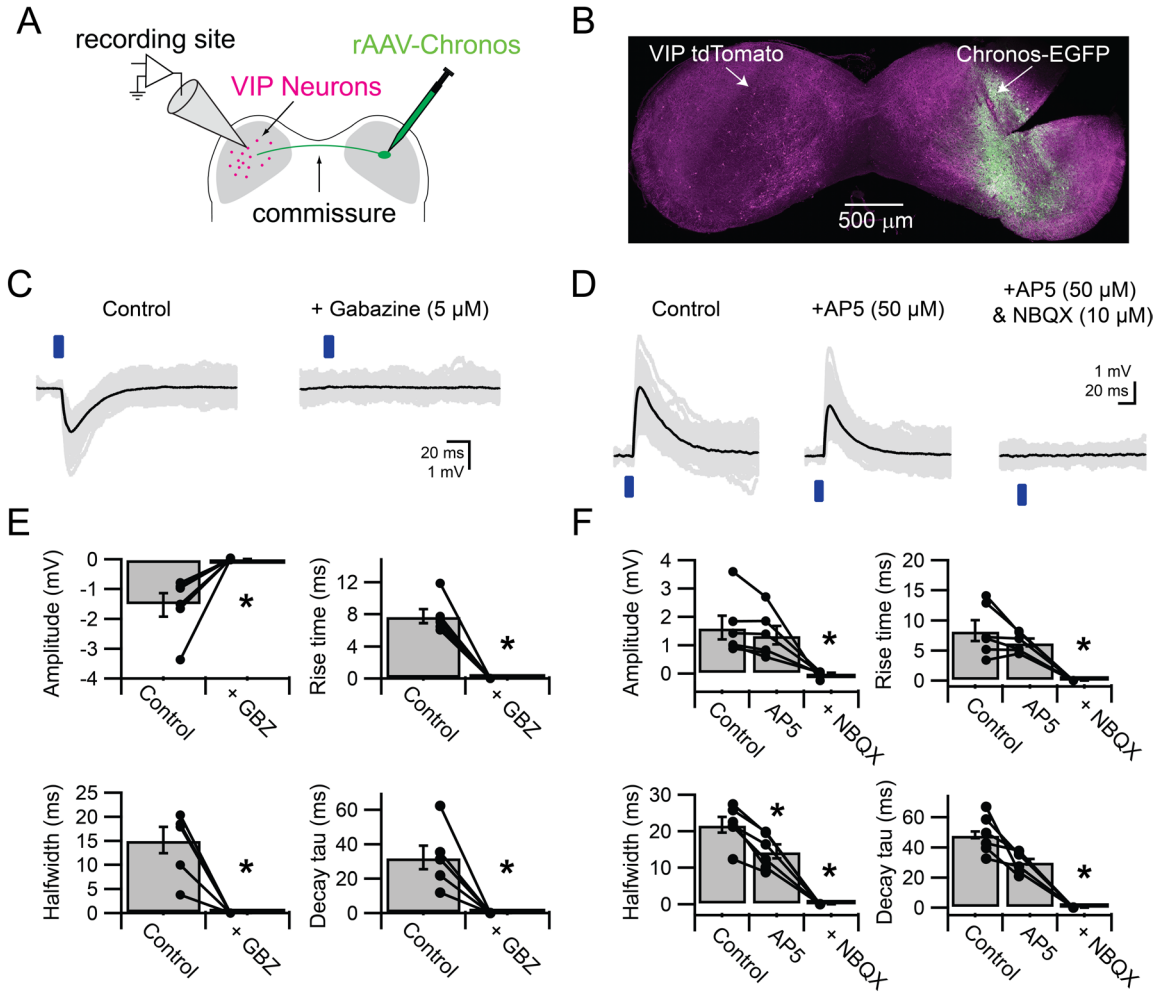

248

**Figure 7. VIP neurons in the ICc receive excitatory and inhibitory synaptic input from the contralateral IC. (A)** Experimental setup. An AAV encoding Chronos-GFP was injected into the right IC. Three weeks later, light-evoked postsynaptic potentials were recorded from VIP neurons in the left ICc. **(B)** Image of a coronal slice of the IC. Injection sites and Chronos expression were validated through Chronos-GFP fluorescence. **(C)** Optogenetically-evoked IPSPs recorded from VIP Neurons in the ICc contralateral to the AAV injection site. IPSPs were evoked by 2 – 5 ms blue light flashes (left), while EPSPs were blocked with NBQX and AP5. IPSPs were abolished by gabazine (right). **(D)** Optogenetically-evoked EPSPs recorded from VIP neurons in the ICc contralateral to the AAV injection site. EPSPs were evoked by 2 – 5 ms blue light flashes (left), while IPSPs were blocked with strychnine and gabazine. Wash-in of AP5 significantly reduced the halfwidth and decay time constant of light-evoked EPSPs (middle). Wash-in of NBQX abolished the remaining EPSP (right). **(E)** Population data showing amplitude and kinetics of optogenetically-evoked IPSPs. **(F)** Population data showing amplitude and kinetics of optogenetically-evoked EPSPs. The significant reduction of EPSP halfwidth by AP5 indicates that NMDA receptor activation prolonged EPSP duration.

249 times ( $7.8 \text{ ms} \pm 2.1 \text{ ms}$ ), halfwidths ( $15.1 \text{ ms} \pm 6.8 \text{ ms}$ ) and decay time constants ( $32.4 \text{ ms} \pm 17.0 \text{ ms}$ )

250 **(Figure 7E).**

251 To investigate excitatory commissural inputs to ICc VIP neurons, recordings were carried out in  
252 the presence of GABA<sub>A</sub> and glycine receptor antagonists (5  $\mu$ M gabazine and 1  $\mu$ M strychnine, bath  
253 application, **Figure 7D**). We found that 2 – 5 ms flashes of blue light elicited EPSPs in 11 out of 27  
254 neurons (**Figure 7D, left**). On average (n = 6), commissural EPSPs in VIP neurons were small (1.52 mV  $\pm$   
255 1.08 mV) and had moderate 10 – 90% rise times (8.3 ms  $\pm$  4.3 ms), halfwidths (19.6 ms  $\pm$  7.6 ms) and  
256 decay time constants (43.5 ms  $\pm$  16.8 ms) (**Figure 7F**). Adding the NMDA receptor antagonist D-AP5 to  
257 the bath significantly reduced the halfwidth of EPSPs (14.3 ms  $\pm$  4.7 ms, p = 0.006) and revealed a trend  
258 toward reducing the rise time (6.3 ms  $\pm$  1.6 ms, p = 0.09) and decay time constant (30.6 ms  $\pm$  7.3 ms, p =  
259 0.06) of EPSPs (ANOVA for repeated measurements with Tukey post-hoc test). The remainder of the  
260 EPSP was completely blocked by the AMPA receptor antagonist NBQX (**Figure 7F**). These results suggest  
261 that VIP neurons in the ICc receive excitatory commissural input and express both AMPA and NMDA  
262 receptors at excitatory commissural synapses. Interestingly, commissural input activated NMDA  
263 receptors even though there was 1 mM Mg<sup>2+</sup> in the bath and the somatic membrane potential was at or  
264 near the resting membrane potential throughout the recording. This may indicate that commissural  
265 synapses are located on the distal dendrites and/or the dendritic spines of VIP neurons.

266 Combined, the commissural CRACM experiments show that VIP neurons in the ICc receive  
267 excitatory and inhibitory synaptic input from the contralateral IC. Surprisingly, although GABAergic  
268 neurons make up  $\leq$  20% of commissural projections (Hernández et al., 2006; Nakamoto et al., 2013),  
269 we found a higher connection probability for inhibitory commissural projections (6 out of 12 recordings,  
270 50%) than for excitatory connections (11 out of 27 recordings, 29%).

### 271 **VIP neurons in the ICc receive synaptic input from the DCN**

272 The DCN provides one of the major sources of excitatory input to the IC (Adams, 1979; Brunso-Bechtold  
273 et al., 1981; Oliver, 1984; Osen, 1972; Ryugo et al., 1981). A previous study has shown that DCN

274 afferents synapse onto glutamatergic and GABAergic neurons in the IC (Chen et al., 2018), but it is not  
275 known which specific classes of IC neurons receive input from the DCN. In addition, the physiology of  
276 DCN afferent synapses remains unknown. To test whether VIP neurons receive synaptic input from DCN  
277 principal neurons, we injected the right DCN with the AAV1.Syn.Chronos-GFP.WPRE.bGH viral vector  
278 and recorded from VIP neurons in the contralateral (left) ICc (**Figure 8A, left**). To confirm selective  
279 transfection of the DCN, we sliced the brainstem of every animal used and determined whether GFP  
280 expression was present and limited to the right DCN. If there was no transfection or if there was  
281 considerable expression of GFP in the auditory nerve or VCN, no recordings were performed. In most  
282 cases, GFP expression was limited to the DCN (**Figure 8A, right**) and GFP-labeled axons were present in  
283 the left ICc.

284 To block spontaneous IPSPs, we performed DCN CRACM experiments with GABAergic and  
285 glycinergic blockers in the bath (5  $\mu$ m gabazine and 1  $\mu$ M strychnine, **Figure 8B**). We found that 2 – 5 ms  
286 pulses of blue light elicited EPSPs in 19 of 25 neurons tested, confirming that ICc VIP neurons receive  
287 synaptic input from the DCN. Light-evoked EPSPs had moderate amplitudes ( $2.85 \text{ mV} \pm 2.98 \text{ mV}$ ) and  
288 relatively slow rise times ( $4.2 \text{ ms} \pm 1.3 \text{ ms}$ ), halfwidths ( $20.6 \text{ ms} \pm 14.4 \text{ ms}$ ) and decay time constants  
289 ( $22.0 \text{ ms} \pm 6.7 \text{ ms}$ ) ( $n = 6$  cells, **Figure 8B, left and 8C**). Because EPSP kinetics were relatively slow, we  
290 hypothesized that DCN synapses activate NMDA receptors on VIP neurons. Interestingly, D-AP5 had no  
291 significant effect on any of the measured properties (amplitude:  $2.80 \text{ mV} \pm 2.54 \text{ mV}$ ,  $p = 0.96$ , rise time:  
292  $4.4 \text{ ms} \pm 1.7 \text{ ms}$ ,  $p = 0.95$ , halfwidth:  $15.4 \text{ ms} \pm 6.1 \text{ ms}$ ,  $p = 0.37$ , decay time constant:  $29.0 \text{ ms} \pm 7.1 \text{ ms}$ ,  $p$   
293  $= 0.16$ , ANOVA for repeated measurements with Tukey post-hoc test) (**Figure 8B, middle, and 8C**). In  
294 contrast to commissural inputs where D-AP5 had a significant effect on EPSP kinetics, this suggests that  
295 DCN inputs to ICc VIP neurons do not activate NMDA receptors under resting conditions. Subsequent  
296 addition of NBQX completely abolished DCN-evoked EPSPs (**Figure 8B, right**), confirming that DCN  
297 synapses activate AMPA receptors on ICc VIP neurons.



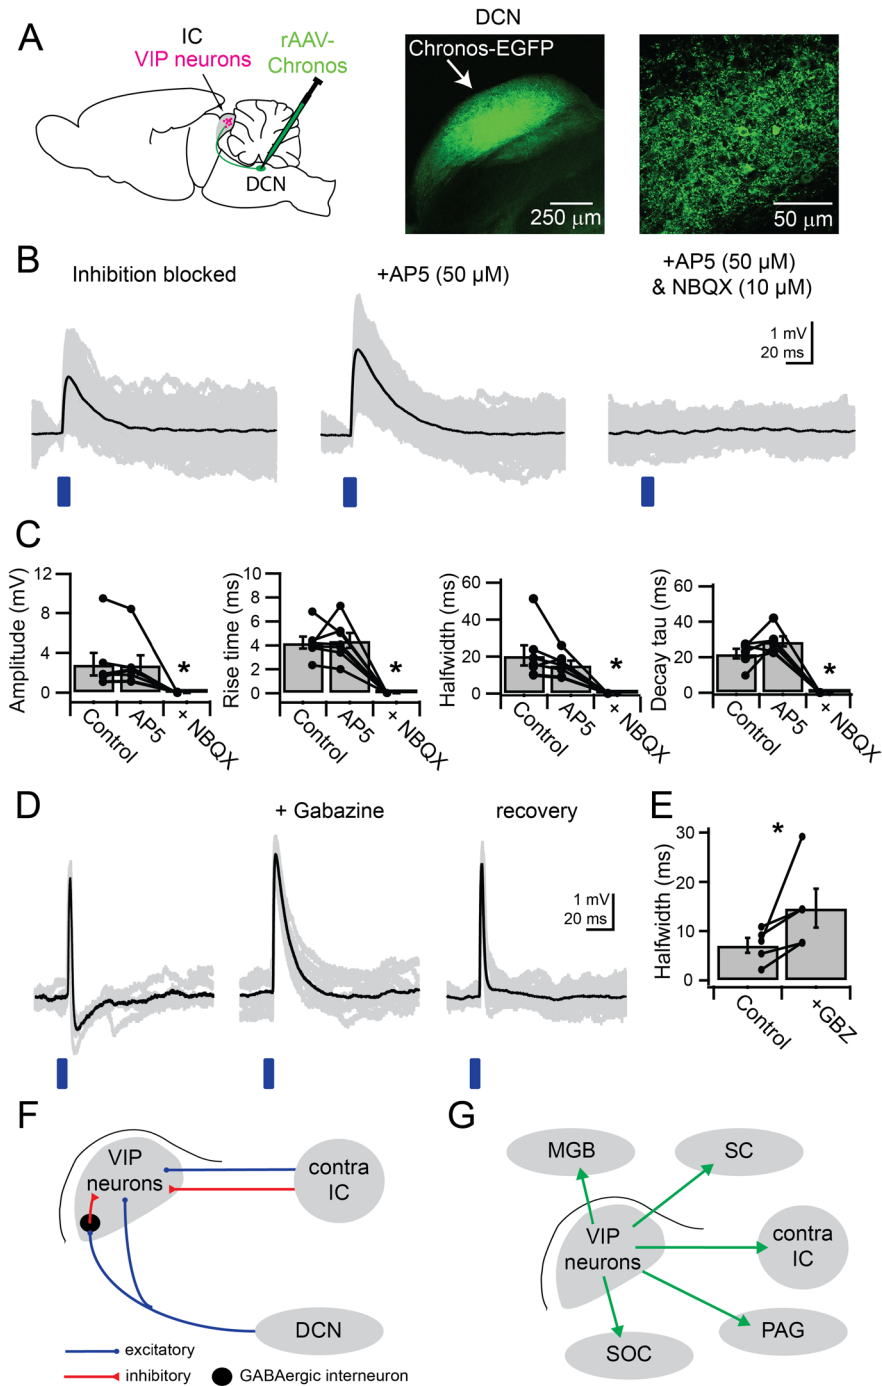

298

299 Given that fusiform cells in the DCN often fire at rates exceeding 100 Hz (Davis et al., 1996; Ma  
 300 and Brenowitz, 2012; Nelken and Young, 1994; Spirou and Young, 1991; Young and Brownell, 1976), the  
 301 slow kinetics of DCN-evoked EPSPs suggests that these EPSPs undergo temporal summation in VIP  
 302 neurons. Together, these results identify VIP neurons in the ICc as a distinct postsynaptic target of DCN

**Figure 8. VIP neurons in the ICc receive direct synaptic input from the DCN and feedforward inhibition driven by DCN afferents. (A)** Experimental setup. An AAV encoding Chronos-GFP was injected into the right DCN. For every experiment, the injection site and Chronos-GFP expression were confirmed through GFP fluorescence. Current clamp recordings were made from VIP neurons in the ICc contralateral to the injection site. **(B)** With inhibition blocked by gabazine and strychnine, 2 – 5 ms blue light flashes evoked EPSPs (left). AP5 did not significantly reduce EPSP halfwidth or decay time constant. Subsequent addition of NBQX abolished the EPSP. **(C)** Population data showing amplitude and kinetics for EPSPs elicited by activation of DCN synapses onto VIP neurons in the ICc. The absence of a significant effect of AP5 indicates that NMDA receptors did not make a significant contribution to EPSPs. **(D)** In several recordings made in the absence of inhibitory blockers, EPSP duration was limited through GABAergic feedforward inhibition (left; n = 5). In these instances, gabazine wash-in increased EPSP halfwidth to values similar to those in (B). **(E)** Population data for feedforward inhibition to VIP neurons. Washing in gabazine increased EPSP halfwidth in 5 out of 5 tested connections. **(F)** Summary of the sources of input to VIP neurons identified by CRACM experiments. **(G)** Summary of the major projection targets of VIP neurons identified by axonal tract tracing: MGB (medial geniculate body), SC (superior colliculus), contralateral IC, PAG (periaqueductal gray), SOC (superior olivary complex).

303 afferents. Given the number of conditions that must be met for a long-range CRACM experiment to  
304 succeed, our observation that the connection probability for DCN to VIP projections was 76% (19 of 25  
305 neurons) suggests that most VIP neurons in the ICc receive input from the DCN.

### 306 **DCN afferents drive local feedforward inhibition onto VIP neurons in the ICc**

307 We next repeated the DCN-CRACM experiments without GABA<sub>A</sub> and glycine receptor antagonists in the  
308 bath. Under these conditions, we observed that an IPSP was elicited 2 – 3 ms after the onset of the light-  
309 evoked EPSP (**Figure 8D**). This IPSP could vary in strength between recorded VIP neurons. In some  
310 instances, the IPSP slightly altered the halfwidth and decay time constant of the EPSP. In other cases, the  
311 IPSP strongly limited the EPSP duration and generated a hyperpolarization after the EPSP (**Figure 8D**,  
312 **left**). Washing in gabazine restored the EPSP to values comparable to the EPSPs recorded in the  
313 presence of inhibitory receptor antagonists (compare **Figure 8B, C**). Washing out gabazine restored the  
314 IPSP and limited EPSP halfwidth again (**Figure 8D, right**). Across five ICc VIP neurons, the IPSP  
315 significantly shortened the halfwidth of the elicited EPSP ( $p = 0.048$ , paired t-test, **Figure 8E**). Halfwidth  
316 reductions ranged from 22% to 73%, with a median reduction of 36%. Because DCN to IC projections are  
317 glutamatergic (Ito and Oliver, 2010; Oliver, 1984), and the periolivary nuclei and nuclei of the lateral  
318 lemniscus, the sources of ascending GABAergic input to the IC (González-Hernández et al., 1996), were

319 not present in the brain slice, this inhibition must be due to DCN afferents activating a local feedforward  
320 inhibitory circuit within the IC. The latency to the IPSP onset also supports the theory of a disynaptic,  
321 local inhibitory circuit, as the IPSP always succeeded the initial EPSP. Thus, these results indicate that  
322 ascending input from the DCN activates a feedforward inhibitory circuit within the IC and that this circuit  
323 regulates the duration of DCN-evoked excitation in ICc VIP neurons.

## 324 **Discussion**

325 By combining molecular genetics with physiological and anatomical approaches, we identified VIP  
326 neurons as a novel class of glutamatergic principal neurons in the auditory midbrain. In contrast to the  
327 diverse properties present in the broader population of IC neurons, VIP neurons consistently exhibited  
328 sustained firing patterns, spiny dendrites, and stellate morphology. Surprisingly, the identification of VIP  
329 neurons revealed that a molecularly-defined class of IC neurons can broadcast the output of the IC to  
330 multiple auditory and non-auditory brain regions. The identification of VIP neurons also enabled us to  
331 identify microcircuit motifs within the IC. In particular, we found that VIP neurons receive ascending  
332 input from the contralateral DCN and commissural input from the contralateral IC. Input from the DCN  
333 also drove feedforward inhibition that could sculpt the effects of excitatory inputs to VIP neurons. Thus,  
334 feedforward inhibitory circuits within the IC may regulate the temporal summation of ascending inputs.  
335 By integrating multiple sources of input and participating in most of the major projections from the IC,  
336 VIP neurons are well-positioned to broadly influence auditory computations in numerous brain regions.

### 337 **VIP neurons are a distinct class of IC neurons**

338 It has long been argued that the classification of neurons requires a multifaceted analysis of  
339 morphological and physiological features (Tyner, 1975). More recent efforts have emphasized the  
340 importance of combining these features with molecular markers (Petilla Interneuron Nomenclature  
341 Group et al., 2008; Tremblay et al., 2016; Zeng and Sanes, 2017). This combination has proven to be  
342 particularly effective for unambiguously classifying neuron types. In the cerebral cortex, a multifaceted  
343 classification scheme including molecular markers has enabled investigations into how specific classes of  
344 interneurons shape circuit computations, sensory processing, and animal behavior (Cichon et al., 2017;  
345 Kato et al., 2017, 2015; Kuchibhotla et al., 2017; Lee et al., 2013; Milstein et al., 2015; Pfeffer et al.,  
346 2013; Pi et al., 2013). Similar approaches have succeeded in the amygdala, hypothalamus, basal ganglia,

347 and other brain regions where it was previously difficult to identify neuron types (Campbell et al., 2017;  
348 Capogna, 2014; Wallace et al., 2017).

349 In the auditory midbrain, previous efforts to identify neuron classes relied on in vitro physiology,  
350 in vivo physiology, morphology, neurochemical markers, or some combination of these (Beebe et al.,  
351 2016; Fujimoto et al., 2017; Malmierca et al., 1993; Oliver and Morest, 1984; Ono et al., 2005; Palmer et  
352 al., 2013; Peruzzi et al., 2000; Ramachandran et al., 1999; Schofield and Beebe, 2018; Sivaramakrishnan  
353 and Oliver, 2001). Despite these and other attempts, the only neuron class that has been consistently  
354 identified in the IC are the large GABAergic neurons (Beebe et al., 2016; Geis and Borst, 2013; Ito et al.,  
355 2015, 2009; Ito and Oliver, 2014). However, there are currently no known molecular markers for large  
356 GABAergic neurons, making it difficult to test the role of these neurons in auditory computations  
357 (Schofield and Beebe, 2018).

358 Using a multifaceted approach, we identified VIP neurons as a novel class of IC neurons. VIP  
359 neurons share a common set of molecular, neurochemical, morphological, and physiological features.  
360 VIP neurons are labeled in the VIP-IRES-Cre mouse line and are glutamatergic. Ninety-three percent of  
361 the ICc VIP neurons in our data set had a stellate morphology and 94% of all IC VIP neurons had  
362 dendritic spines. Similarly, 90% of VIP neurons had sustained firing patterns. Although the input  
363 resistance, membrane time constant, and expression of  $I_h$  varied within the population of VIP neurons,  
364 for VIP neurons in the ICc, we found that a portion of this variability reflected their location along the  
365 tonotopic axis of the ICc.

366 It is important to note that it would not be possible to identify VIP neurons based on their  
367 morphology or physiology alone. VIP neurons are not the only stellate neurons in the IC, nor are they  
368 the only neurons with sustained firing patterns or dendritic spines. These results provide insight to why

369 it has been difficult to classify neuron types in the IC. We propose that a multidimensional approach  
370 incorporating molecular markers will be essential to identifying the remaining neuron classes in the IC.

### 371 **Diverse projection patterns of VIP neurons**

372 We found that VIP neurons project not only to MGB and contralateral IC, the most common recipients  
373 of IC projections, but also to the nucleus of the brachium of the IC, superior colliculus, periaqueductal  
374 gray, superior olivary complex, and ipsilateral IC (**Figure 6**). The number of extrinsic targets reached by  
375 VIP axons was a surprise given the relatively small population of VIP neurons. Do individual VIP neurons  
376 project to multiple targets? Previous retrograde labeling studies suggest that some patterns of collateral  
377 projection are more common than others for IC cells. IC cells that project to the contralateral thalamus  
378 appear to quite commonly have a collateral projection to the ipsilateral thalamus (Mellott et al., 2018).  
379 In contrast, very few IC neurons project to the thalamus and the cochlear nucleus (Coomes and  
380 Schofield, 2004; Hashikawa and Kawamura, 1983; Okoyama et al., 2006), or to the left and right cochlear  
381 nuclei (Schofield, 2001). Whether IC commissural cells can have collateral projections to the thalamus  
382 has been supported (González-Hernández et al., 1996) or denied (Okoyama et al., 2006). Because  
383 retrograde tracing studies underestimate collateral projections (Schofield et al., 2007), such studies may  
384 have missed VIP neurons with collateral projections.

385         Alternatively, individual VIP neurons might project to one or a few targets. It would then be  
386 possible to subdivide VIP neurons based on their axonal projections. This would parallel the cerebral  
387 cortex, where the major classes of interneurons contain subclasses that often differ in their axonal  
388 targeting (Tremblay et al., 2016). If such is the case, then the unifying feature of VIP neurons might be  
389 that they perform similar computational roles within circuits, even when the circuits themselves are  
390 involved in different functions. In any event, the axonal projection patterns of individual VIP neurons, to

391 extrinsic targets and within the IC, will be important features for further characterizing VIP subclasses  
392 and their functional roles.

### 393 **Integration of synaptic input by VIP neurons**

394 Our results show that VIP neurons receive input from at least four sources: principal neurons in the DCN,  
395 local inhibitory neurons, and excitatory and inhibitory neurons in the contralateral IC (**Figure 8G**). In  
396 multiple instances, we observed that VIP neurons received input from the DCN and a local inhibitory  
397 neuron or a combination of excitatory and inhibitory commissural input. Given that optogenetic circuit  
398 mapping experiments underestimate connection probabilities (not all synapses are transfected by the  
399 virus), these results suggest that many individual VIP neurons integrate input from ascending, local, and  
400 commissural sources. In future studies, it will be important to determine whether VIP neurons receive  
401 additional sources of synaptic input, as previous studies have shown that individual IC neurons can  
402 integrate input from numerous sources (Ito et al., 2015; Ito and Oliver, 2014).

403         Excitatory postsynaptic responses in IC neurons often involve activation of NMDA receptors (Ma  
404 et al., 2002; Wu et al., 2004). Under in vivo conditions, the activation of NMDA receptors can influence  
405 how IC neurons respond to tones (Sanchez et al., 2007). In VIP neurons, we found that excitatory  
406 commissural synapses activated AMPA and NMDA receptors, while synaptic input from DCN afferents  
407 activated only AMPA receptors. The activation of NMDA receptors occurred even though our ACSF  
408 contained 1 mM Mg<sup>2+</sup> and neurons were at their resting membrane potential. Interestingly, previous  
409 studies have shown that NMDA receptors in some IC neurons can be activated under similar conditions,  
410 even when AMPA receptors are blocked (Ma et al., 2002; Sivaramakrishnan and Oliver, 2006). The  
411 activation of NMDA receptors in our recordings may indicate that excitatory commissural synapses tend  
412 to be located on the distal dendrites or dendritic spines of VIP neurons, where the local membrane  
413 potential might be sufficiently depolarized by activation of AMPA receptors to remove Mg<sup>2+</sup> block of

414 NMDA receptors. A distal location would be consistent with the proposed modulatory role for  
415 commissural inputs (Orton et al., 2016; Orton and Rees, 2014). Similarly, the lack of NMDA receptor  
416 activation by DCN afferents might indicate that DCN synapses are located proximal to the soma, possibly  
417 on the soma itself, or that these synapses lack NMDA receptors. These synaptic arrangements may have  
418 important implications for auditory coding and synaptic plasticity mechanisms in VIP neurons.

419           In many brain regions, feedforward inhibitory circuits control the time window for temporal  
420 integration of synaptic input (Gabernet et al., 2005; Pouille and Scanziani, 2001; Roberts et al., 2013;  
421 Stokes and Isaacson, 2010). In the ICc, it was recently shown that GABAergic neurons provide local  
422 inhibitory input mainly to neurons in the same isofrequency lamina (Sturm et al., 2014). However, the  
423 conditions that recruit local inhibition have remained unclear. Our data provide direct evidence that  
424 activation of DCN afferents can elicit both direct excitatory input and disynaptic feedforward inhibition  
425 to VIP neurons. Feedforward inhibition can dramatically reduce EPSP halfwidth, suggesting that local  
426 feedforward inhibition regulates the temporal summation of synaptic inputs. In addition, while DCN  
427 afferents elicited modest EPSPs in VIP neurons, DCN input presumably drove spiking in the GABAergic  
428 neurons that provided feedforward inhibition. It will be important for future studies to identify this  
429 population of GABAergic neurons and the extent of their influence on auditory computations in VIP and  
430 other IC neurons.



431 **Material and Methods**

432 *Animals*

433 All experiments were approved by the University of Michigan Institutional Animal Care and Use  
434 Committee and were in accordance with NIH guidelines for the care and use of laboratory animals.  
435 Animals were kept on a 12 hour day/night cycle with ad libitum access to food and water. VIP-IRES-Cre  
436 mice (*Vip<sup>tm1(cre)Zjh</sup>/J*, Jackson Laboratory, stock # 010908)(Taniguchi et al., 2011) were crossed with Ai14  
437 reporter mice (B6.Cg-*Gt(ROSA)26Sor<sup>tm14(CAG-tdTomato)Hze</sup>/J*, Jackson Laboratory, stock # 007914)(Madisen et  
438 al., 2010) to yield F1 offspring that expressed the fluorescent protein tdTomato in VIP neurons. For  
439 control experiments, C57BL/6J mice (Jackson Laboratory, stock # 000664) were used.

440

441 *Immunohistochemistry*

442 Mice were deeply anesthetized and perfused transcardially with 0.1 M phosphate-buffered saline (PBS),  
443 pH 7.4, for 1 min and then with a 10% buffered formalin solution (Millipore Sigma, cat# HT501128) for  
444 10 min. Brains were collected and post-fixed in the same fixative for 2 hours and cryoprotected  
445 overnight at 4 °C in 0.1 M PBS containing 20% sucrose. Brains were cut into 40 µm sections on a  
446 vibratome or freezing microtome. Sections were rinsed in 0.1 M PBS, and then treated with 10% normal  
447 donkey serum (Jackson ImmunoResearch Laboratories, West Grove, PA) and 0.3% Triton X-100 for 2  
448 hours. Slides were incubated overnight at 4 °C in mouse anti-GAD67 (1:1000; Millipore Sigma, cat#  
449 MAB5406), rabbit anti-NeuN (1:500; Millipore Sigma, cat# ABN78), or rabbit anti-bNOS (1:1000;  
450 Millipore Sigma, cat# N2280). The next day, sections were rinsed in 0.1 M PBS and incubated in Alexa  
451 Fluor 488-tagged donkey anti-mouse IgG or donkey anti-rabbit IgG (1:500, Thermo Fisher, cat# A-21202  
452 and A-21206) for 1 hour at room temperature. Sections were then mounted on gelatin-subbed slides  
453 (SouthernBiotech, cat# SLD01-BX) and coverslipped using Fluoromount-G (SouthernBiotech, cat# 0100-

454 01). Images were collected using a 1.30 NA 40x oil-immersion objective or a 1.40 NA 63x oil-immersion  
455 objective on a Leica TCS SP8 laser scanning confocal microscope.

456

#### 457 *Antibody validation*

458 The mouse monoclonal anti-GAD67 antibody (Millipore Sigma, cat# MAB5406) was raised against the 67  
459 kDa isoform of glutamic acid decarboxylase (GAD). The manufacturer reports that Western blot analysis  
460 shows no cross-reactivity with the 65 kDa isoform of GAD (GAD65). This antibody has been previously  
461 used to identify GABAergic cells in the IC (Beebe et al., 2016; Ito et al., 2009; Mellott et al., 2014). The  
462 mouse monoclonal anti-nitric oxide synthase-brain (bNOS) (Sigma, cat# N2280) was raised against the  
463 IgG1 isotype from the NOS-B1 hybridoma. The manufacturer reports that anti-bNOS reacts specifically  
464 with nitric oxide synthase (NOS), derived from brain (bNOS, 150-160 kDa). This antibody has been  
465 previously used, in guinea pig, to delineate the borders of the IC (Coote and Rees, 2008). To perform  
466 NeuN staining, we used a rabbit polyclonal antibody (Millipore Sigma, cat# ABN78). The manufacturer  
467 reports that anti-NeuN specifically recognizes the DNA-binding, neuron-specific protein NeuN, which is  
468 present in most central and peripheral neuronal cell types of all vertebrates tested. Previous studies  
469 reported the use of this antibody to label neurons in the IC (Beebe et al., 2016; Foster et al., 2014;  
470 Mellott et al., 2014).

471

#### 472 *Analysis of GAD67 staining*

473 Images from representative sections of the IC (n = 3 animals, 2 sections per animal, one caudal and one  
474 middle) were collected at 2  $\mu$ m depth intervals with a 1.30 NA 40x oil-immersion objective on a Leica  
475 TCS SP8 laser scanning confocal microscope. Images were analyzed using Fiji software (Rueden et al.,  
476 2017; Schindelin et al., 2012). Consistent with previous studies, we found that the anti-GAD67 antibody

477 did not penetrate the entire depth of the tissue sections (Beebe et al., 2016; Mellott et al., 2014). We  
478 therefore restricted our analysis to the top 10 – 12  $\mu\text{m}$  of each section, where the antibody was fully  
479 penetrant. Within this region, we manually marked every GAD67<sup>+</sup> cell body and every tdTomato<sup>+</sup> cell  
480 body in the left IC. The green (GAD67) and red (tdTomato) color channels were analyzed separately, so  
481 that labeling in one channel did not influence analysis of the other channel. After cells were marked, the  
482 GAD67 and tdTomato color channels were merged, and every instance where a cell body contained  
483 markers for both GAD67 and tdTomato was counted. The number of double-labeled cells was compared  
484 to the total number of tdTomato<sup>+</sup> neurons to determine the percentage of tdTomato<sup>+</sup> neurons that  
485 were GAD67<sup>+</sup>.

486

#### 487 *Analysis of NeuN staining with design-based stereology*

488 A design-based stereology approach was used to estimate the numbers of NeuN<sup>+</sup> and tdTomato<sup>+</sup>  
489 neurons in anti-NeuN stained sections (Schmitz and Hof, 2005). To collect systematic random samples, a  
490 virtual 370  $\mu\text{m}$  x 370  $\mu\text{m}$  grid was overlaid on the IC section. The starting coordinates for the grid were  
491 set using the Mersenne Twister random number generator in Igor Pro 7 or 8 (WaveMetrics Inc.). Images  
492 were then collected at coordinates determined by the upper-left intersection of each grid-square that  
493 fell over the left IC. Each image consisted of a 184  $\mu\text{m}$  x 184  $\mu\text{m}$  Z-stack collected at 1  $\mu\text{m}$  depth intervals  
494 with a 1.40 NA 63x oil immersion objective on a Leica TCS SP8 confocal microscope. Six to sixteen images  
495 were collected per slice. Three slices were analyzed per mouse, with slices from each mouse evenly  
496 distributed along the rostral-caudal axis of the IC. Images were imported to NeuroLucida 360 (MBF  
497 Bioscience), where neurons were counted using the optical fractionator approach (West et al., 1991). In  
498 this approach, we determined the image planes corresponding to the top, center, and bottom of the  
499 slice in each image stack. Top and bottom regions of each slice ( $\geq 2$   $\mu\text{m}$  thick) were treated as guard  
500 zones and discarded from subsequent analysis. Removal of guard zones left a 15  $\mu\text{m}$ -thick region at the

501 center of the slice for subsequent analysis. Neurons within this region were counted by making a single  
502 mark at the top of each cell. Cells crossing the right and top borders of the image stack were counted,  
503 whereas those crossing the left and bottom borders were not. The green (NeuN) and red (tdTomato)  
504 color channels were analyzed separately, so that labeling in one channel did not affect analysis of the  
505 other. Next, the color channels were merged and cells with both NeuN and tdTomato markers were  
506 counted. In every instance, tdTomato<sup>+</sup> cells were also NeuN<sup>+</sup> (205/205 cells). The total number of  
507 double-labeled (tdTomato<sup>+</sup>/NeuN<sup>+</sup>) cells was then compared to the total number of NeuN<sup>+</sup> cells.

508

#### 509 *Analysis of the distribution of VIP neurons*

510 Following transcardial perfusion as described previously, brains from three VIP-IRES-Cre x Ai14 mice  
511 were frozen and sectioned on a sliding microtome. Brains were cut into 40 μm sections, one each in the  
512 transverse, sagittal, and horizontal planes, and sections were collected in three series. The distribution  
513 of tdTomato-expressing (VIP<sup>+</sup>) cells in one series from each case was analyzed using a NeuroLucida  
514 system (MBF Bioscience, Williston, VT) attached to a Zeiss Axioimager.Z1 fluorescence microscope.  
515 Major IC subdivisions, including the central nucleus (ICc), dorsal cortex, (ICd) and lateral cortex (ICl),  
516 were identified by comparing bNOS and GAD67 immunostains with previous studies of mouse IC  
517 (Willard and Ryugo, 1983; Meininger et al., 1986; Ono et al., 2016; Dillingham et al., 2017). NeuroLucida  
518 Explorer was used to export drawings to Adobe Illustrator for figure preparation.

519

#### 520 *Electrophysiology*

521 Mice of either sex were used, aged postnatal day (P) 21 to P70 for VIP-IRES-Cre x Ai14 crosses and P21  
522 to P113 for C57BL/6J animals. Mice were deeply anesthetized with isoflurane, decapitated, and the  
523 brain was dissected quickly in ~34° C artificial cerebrospinal fluid (ACSF) containing (in mM): 125 NaCl,

524 12.5 Glucose, 25 NaHCO<sub>3</sub>, 3 KCl, 1.25 NaH<sub>2</sub>PO<sub>4</sub>, 1.5 CaCl<sub>2</sub>, 1 MgSO<sub>4</sub>, bubbled to a pH of 7.4 with 5% CO<sub>2</sub> in  
525 95% O<sub>2</sub>. Chemicals were obtained from Fisher Scientific or Millipore Sigma unless stated otherwise.  
526 Coronal or parasagittal slices (200 – 250 μm) containing the IC were cut with a vibrating microtome  
527 (VT1200S, Leica Biosystems) and incubated at 34 °C for 30 minutes in a holding chamber filled with ACSF  
528 and bubbled with 5% CO<sub>2</sub> in 95% O<sub>2</sub>. After incubation, slices were stored at room temperature until used  
529 for recordings.

530 To make recordings, slices were placed in a recording chamber under a fixed stage upright  
531 microscope (BX51WI, Olympus Life Sciences) and were constantly perfused with 34 °C ACSF at ~2  
532 ml/min. All recordings were conducted near physiological temperature (34 °C). IC neurons were patched  
533 under visual control using infrared Dodt gradient contrast and epifluorescence imaging. Recordings were  
534 performed with a BVC-700A patch clamp amplifier (Dagan Corporation). Data were low pass filtered at  
535 10 kHz, sampled at 50 kHz with a National Instruments PCIe-6343 data acquisition board, and acquired  
536 using custom written algorithms in Igor Pro. For every recording, series resistance and pipette  
537 capacitance were corrected using the bridge balance circuitry of the BVC-700A. Recordings with a series  
538 resistance above 25 MΩ were discarded. All membrane potentials have been corrected for a liquid  
539 junction potential of 11 mV.

540 Electrodes were pulled from borosilicate glass (outer diameter 1.5 mm, inner diameter 0.86  
541 mm, Sutter Instrument) to a resistance of 3.5 – 4.5 MΩ using a P-1000 microelectrode puller (Sutter  
542 Instrument). The electrode internal solution contained (in mM): 115 K-gluconate, 7.73 KCl, 0.5 EGTA, 10  
543 HEPES, 10 Na<sub>2</sub> phosphocreatine, 4 MgATP, 0.3 NaGTP, supplemented with 0.1% biocytin (w/v), pH  
544 adjusted to 7.3 with KOH and osmolality to 290 mmol/kg with sucrose.

545 Input resistance was determined by delivering a series of 100 ms hyperpolarizing current steps  
546 incremented to elicit hyperpolarization ranging from just below the resting membrane potential to

547 < -110 mV. For each response, the amplitudes of the peak (most negative value) and steady-state  
548 (average of last 10 ms of response) hyperpolarization were measured relative to the resting potential.  
549 Voltage versus current plots were prepared, and input resistance was determined from the slopes of  
550 lines fit to the peak ( $R_{pk}$ ) and steady-state ( $R_{ss}$ ) data for current steps that achieved a peak  
551 hyperpolarization between 0 and -15 mV relative to rest. Membrane time constant was determined by  
552 delivering 50 current steps at an amplitude that hyperpolarized the membrane potential by 1 – 3 mV.  
553 Current step duration was set to ensure that the membrane potential achieved a steady-state value  
554 before the end of the current step. An exponential function was then fit to onset of each response and  
555 the median time constant determined.

556 To isolate or manipulate synaptic events, the following pharmacological agents were used, all  
557 diluted in standard ACSF: 5  $\mu$ M SR95531 (gabazine, GABA<sub>A</sub> receptor antagonist, Hello Bio), 1  $\mu$ M  
558 strychnine hydrochloride (glycine receptor antagonist, Millipore Sigma), 50  $\mu$ M D-AP5 (NMDA receptor  
559 antagonist, Hello Bio), 10  $\mu$ M NBQX disodium salt (AMPA receptor antagonist, Hello Bio).

560 Data analysis was performed using custom written algorithms in Igor Pro or MATLAB (Mathworks).  
561 Statistical tests were performed in R Studio (RStudio, Boston) for R 3.5.1 (The R Project for Statistical  
562 Computing, The R Foundation).

563

#### 564 *Post-hoc reconstructions of morphology and morphology analysis*

565 After recordings, the electrode was removed slowly to allow the cell membrane to reseal, and the slice  
566 was fixed in 4% paraformaldehyde (PFA) in 0.1 M phosphate buffer (PB, pH 7.4) for 12 – 24 hours. Slices  
567 were then washed in 0.1 M PB and stored in 0.1 M PB for up to three weeks. Recorded neurons were  
568 stained using fluorescent biocytin-streptavidin histochemistry. In brief, slices were washed in 0.1 M PB  
569 three times for 10 minutes (3 x 10 min in PB), permeabilized in 0.2% Triton X-100 in 0.1 M PB for 2

570 hours, washed 3 x 10 min in PB, and stained at 4 °C for 48 hours with streptavidin-Alexa Fluor 488 or  
571 647, diluted 1:1000 in 0.1 M PB. Slices were then washed 3 x 10 min in PB and mounted on Superfrost  
572 Plus microscope slides in anti-fade media (Fluoromount-G). Z-stack images of streptavidin-Alexa Fluor  
573 labeled cells were obtained with a Leica TCS SP8 laser scanning confocal microscope using a 1.40 NA 63x  
574 oil-immersion objective. Three-dimensional reconstructions of neuronal morphology and quantitative  
575 analyses of soma and dendrite shape were performed on image stacks imported into NeuroLucida 360  
576 (MBF Bioscience). To facilitate comparisons of neuronal morphology, all reconstructed neurons are  
577 displayed as if they were in the left IC as viewed from a caudal perspective. Reconstructions of neurons  
578 that were located in the right IC were flipped along the dorsal-ventral axis so that they appear as if they  
579 were in the left IC.

580

#### 581 *Correlation of neuron location and intrinsic physiology*

582 Following biocytin-streptavidin histochemistry, tile scan images of the entire IC were collected using a  
583 20x objective on a Leica TCS SP8 confocal microscope. These images were then used to determine  
584 medial-lateral and dorsal-ventral coordinates of recorded neurons. The medial-lateral coordinate was  
585 measured as the distance of the soma from the medial axis (midline) of the IC slice (x axis). The dorsal-  
586 ventral coordinate was measured as the distance of the soma from the dorsal-most edge of the IC slice  
587 (y axis). Neurons in the right IC were combined with those from the left IC by multiplying the medial-  
588 lateral coordinate of neurons from the right IC by -1. Neuron coordinates were then compared to  
589 physiological parameters obtained during whole cell recordings. To test for correlations, data were fit  
590 with a plane using the Levenberg-Marquardt least squares method in Igor Pro. Fit quality was assessed  
591 with Pearson's correlation coefficient and the adjusted R<sup>2</sup>. Fit significance (p value) was calculated based  
592 on the chi-squared statistic from the fit and the chi-squared cumulative distribution function.

593

594 *Determination of major axes of neuron morphology*

595 Neuron morphology was reconstructed as described above. To determine the “length” and “width” axes  
596 of the dendritic arbors, the set of coordinates describing the morphology of the dendritic arbor of each  
597 neuron was exported from NeuroLucida 360 (MBF Bioscience). Coordinates were imported to Igor Pro,  
598 where principal components analysis (PCA) was performed on either the x and y coordinates (2D PCA) or  
599 the x, y, and z coordinates (3D PCA). The orientation of the length and width axes was then derived from  
600 the first and second principal directions of the resulting eigenvector matrices. 2D PCA was used to  
601 determine the orientation of neurons within the coronal plane. 3D PCA was used to determine the axes  
602 to use for measuring dendritic arbor length/width ratios. For this, the spread of the dendritic arbor  
603 along the first and second principal directions was determined by rotating each morphology coordinate  
604 set according to its eigenvector matrix, then calculating the range from the minimum to maximum  
605 coordinates along the x (length, first principal direction) and y (width, second principal direction) axes.

606

607 *Intracranial virus injections*

608 Intracranial virus injections were performed on mice age P21 – P35 using standard aseptic techniques.  
609 Throughout the procedure, mice were anesthetized with isoflurane and their body temperature  
610 maintained with a homeothermic heating pad. An injection of the analgesic carprofen (5 mg/kg,  
611 CarproJect, Henry Schein Animal Health) was delivered subcutaneously. The scalp was shaved and a  
612 rostral-caudal incision was made along the midline to expose the skull. Injection sites were mapped  
613 using stereotaxic coordinates relative to the lambda suture. A single craniotomy was performed using a  
614 micromotor drill (K.1050, Foredom Electric Co.) with a 0.5 mm burr (Fine Science Tools).

615       Viral constructs were injected with a NanoJect III nanoliter injector (Drummond Scientific  
616 Company) connected to a MP-285 micromanipulator (Sutter Instruments). Glass injection pipettes were  
617 prepared by pulling capillary glass (Drummond Scientific Company) with a P-1000 microelectrode puller



**Table 3. Stereotaxic coordinates for virus injections.** All coordinates are relative to the lambda suture.

| Location                                | X coordinate (caudal) | Y coordinate (lateral) | Z coordinates (depth)                                |
|-----------------------------------------|-----------------------|------------------------|------------------------------------------------------|
| Right IC penetration 1 (CRACM)          | -900 $\mu\text{m}$    | 1000 $\mu\text{m}$     | 2250-1500 $\mu\text{m}$ , 250 $\mu\text{m}$ interval |
| Right IC penetration 2 (CRACM)          | -900 $\mu\text{m}$    | 1250 $\mu\text{m}$     | 2250-1750 $\mu\text{m}$ , 250 $\mu\text{m}$ interval |
| Right IC penetration 1 (axonal tracing) | -900 $\mu\text{m}$    | 1000 $\mu\text{m}$     | 1850 $\mu\text{m}$ , 2000 $\mu\text{m}$              |
| Right DCN                               | -1325 $\mu\text{m}$   | 2150 $\mu\text{m}$     | 4750 $\mu\text{m}$ , 4550 $\mu\text{m}$              |

618 (Sutter Instrument). The injector tip was cut to an opening of  $\sim 20 \mu\text{m}$  and beveled at  $30^\circ$  with a BV-10  
619 pipette beveller (Sutter Instrument). Injectors were back-filled with mineral oil and then front-filled with  
620 virus. AAV1.Syn.Chronos-GFP.WPRE.bGH (University of Pennsylvania Vector Core, Lot# CS1027L,  
621  $2.986 \times 10^{13}$  genome copies (GC)/ml) was used for CRACM experiments. AAV1.CAG.FLEX.eGFP.WPRE.bGH  
622 (Allen Institute 854, University of Pennsylvania Vector Core, Lot# CS0922,  $4.65 \times 10^{13}$  GC/ml) was used for  
623 axonal tract tracing. For CRACM experiments, the IC was injected via two penetrations. Virus deposits  
624 were made at 250  $\mu\text{m}$  intervals along the dorsal-ventral axis, resulting in four deposits in penetration 1  
625 and three deposits in penetration 2. At each depth, 20 nl of virus was deposited, resulting in seven virus  
626 deposits and a total load of 140 nl virus per injected IC. DCN injections were limited to two deposits of  
627 20 nl virus. For axonal tracing studies, viral load was reduced to 40 nl total (20 nl per site) to achieve  
628 sparser labeling of neurons. Injections were made at the coordinates shown in **Table 3**.

629 After injections were completed, the scalp was sutured with Ethilon 6-0 (0.7 metric) nylon  
630 sutures (Ethicon USA LLC), and the wound was treated with 0.5 – 1 ml 2% Lidocaine hydrochloride jelly  
631 (Akorn Inc.). Once mice were ambulatory, they were returned to the vivarium where they were  
632 monitored daily until sutures fell out and the wound was completely healed.

633

634 *Channelrhodopsin-assisted circuit mapping*

635 After allowing 3 – 4 weeks for Chronos expression, animals were used for in vitro slice electrophysiology  
636 experiments as described above, with the exception that after decapitation all steps were performed in  
637 red light and recordings were conducted in darkness or red light to limit Chronos activation. For CRACM  
638 experiments, recordings were targeted to VIP neurons only. During whole cell recordings, Chronos was  
639 activated by brief pulses of 470 nm light emitted by a blue LED coupled to the epi-fluorescence port of  
640 the microscope. Blue light flashes were 2 to 5 ms long and optical power density ranged from 6 – 48  
641 mW/mm<sup>2</sup>, using a minimal stimulation protocol. Recording sweeps with light flashes were repeated 20  
642 to 50 times in 0.5 – 1 s intervals to obtain average PSP values. During experiments to investigate  
643 receptor contribution to PSPs, drugs were washed in for at least 10 minutes before recording under the  
644 new condition. For each receptor antagonist, 7 - 8 washout experiments were conducted. In each case,  
645 drug effects reversed after washout (data not shown).

646

647 *Axonal projections*

648 The right IC of VIP-IRES-Cre x Ai14 mice was injected with AAV1.CAG.FLEX.eGFP.WPRE.bGH and  
649 transcardially perfused 3 – 4 weeks later, as described above. Brains were frozen and sectioned at 40 µm  
650 on a sliding microtome. For some brains, sections were collected serially, and for others, sections were  
651 collected in three series. The brains were examined for eGFP-labeled axons and boutons, which were  
652 interpreted as VIP<sup>+</sup> projections originating in the IC. Some sections were counterstained with a  
653 fluorescent Nissl stain (Neurotrace 640/660, ThermoFisher, cat# N21483). Injection sites comprised a  
654 collection of eGFP-labeled cell bodies. Cases were included for analysis only if the eGFP labeled cell  
655 bodies were restricted to the IC. Images were collected on a Zeiss AxioImager.Z2 microscope. High  
656 magnification images were collected as z-stacks using a 1.40 NA 63X oil-immersion objective and  
657 structured illumination (Zeiss Apotome 2) for optical sectioning at 0.5 µm intervals. Images shown are

658 maximum projections of collected stacks. Adobe Photoshop was used to colorize images, to globally  
659 adjust levels, and to add scale bars.

660 **Acknowledgements:** We thank Gabriel Corfas and Carol F. Elias for helpful discussions and advice. This  
661 work was supported by a Deutsche Forschungsgemeinschaft Research Fellowship (GO 3060/1-1, project  
662 number 401540516, to DG), an Emerging Research Grant from the Hearing Health Foundation (MTR),  
663 and National Institutes of Health Grants R56 DC016880 (MTR) and R01 DC004391 (BRS).

664 **Competing interests:** The authors declare they have no financial or non-financial competing interests.

## 665 References

- 666 Adams JC. 1979. Ascending projections to the inferior colliculus. *J Comp Neurol* **183**:519–538.  
667 doi:10.1002/cne.901830305
- 668 Baumann VJ, Lehnert S, Leibold C, Koch U. 2013. Tonotopic organization of the hyperpolarization-  
669 activated current (I<sub>h</sub>) in the mammalian medial superior olive. *Front Neural Circuits* **7**:117.  
670 doi:10.3389/fncir.2013.00117
- 671 Beebe NL, Young JW, Mellott JG, Schofield BR. 2016. Extracellular Molecular Markers and Soma Size of  
672 Inhibitory Neurons: Evidence for Four Subtypes of GABAergic Cells in the Inferior Colliculus. *J*  
673 *Neurosci Off J Soc Neurosci* **36**:3988–3999. doi:10.1523/JNEUROSCI.0217-16.2016
- 674 Brunso-Bechtold JK, Thompson GC, Masterton RB. 1981. HRP study of the organization of auditory  
675 afferents ascending to central nucleus of inferior colliculus in cat. *J Comp Neurol* **197**:705–722.  
676 doi:10.1002/cne.901970410
- 677 Calford MB, Aitkin LM. 1983. Ascending projections to the medial geniculate body of the cat: evidence  
678 for multiple, parallel auditory pathways through thalamus. *J Neurosci* **3**:2365–2380.  
679 doi:10.1523/JNEUROSCI.03-11-02365.1983
- 680 Campbell JN, Macosko EZ, Fenselau H, Pers TH, Lyubetskaya A, Tenen D, Goldman M, Verstegen AMJ,  
681 Resch JM, McCarroll SA, Rosen ED, Lowell BB, Tsai LT. 2017. A molecular census of arcuate  
682 hypothalamus and median eminence cell types. *Nat Neurosci* **20**:484–496. doi:10.1038/nn.4495
- 683 Capogna M. 2014. GABAergic cell type diversity in the basolateral amygdala. *Curr Opin Neurobiol*, SI:  
684 Inhibition: Synapses, Neurons and Circuits **26**:110–116. doi:10.1016/j.conb.2014.01.006
- 685 Chen C, Cheng M, Ito T, Song S. 2018. Neuronal Organization in the Inferior Colliculus Revisited with Cell-  
686 Type-Dependent Monosynaptic Tracing. *J Neurosci Off J Soc Neurosci* **38**:3318–3332.  
687 doi:10.1523/JNEUROSCI.2173-17.2018
- 688 Cichon J, Blanck TJJ, Gan W-B, Yang G. 2017. Activation of cortical somatostatin interneurons prevents  
689 the development of neuropathic pain. *Nat Neurosci* **20**:1122–1132. doi:10.1038/nn.4595
- 690 Coomes DL, Schofield BR. 2004. Separate projections from the inferior colliculus to the cochlear nucleus  
691 and thalamus in guinea pigs. *Hear Res* **191**:67–78. doi:10.1016/j.heares.2004.01.009
- 692 Coote EJ, Rees A. 2008. The distribution of nitric oxide synthase in the inferior colliculus of guinea pig.  
693 *Neuroscience* **154**:218–225. doi:10.1016/j.neuroscience.2008.02.030
- 694 Davis KA, Ding J, Benson TE, Voigt HF. 1996. Response properties of units in the dorsal cochlear nucleus  
695 of unanesthetized decerebrate gerbil. *J Neurophysiol* **75**:1411–1431.  
696 doi:10.1152/jn.1996.75.4.1411
- 697 Dillingham CH, Gay SM, Behrooz R, Gabriele ML. 2017. Modular-extramodular organization in  
698 developing multisensory shell regions of the mouse inferior colliculus. *J Comp Neurol* **525**:3742–  
699 3756. doi:10.1002/cne.24300
- 700 Felix RA, Gourévitch B, Portfors CV. 2018. Subcortical pathways: Towards a better understanding of  
701 auditory disorders. *Hear Res* **362**:48–60. doi:10.1016/j.heares.2018.01.008
- 702 Foster NL, Mellott JG, Schofield BR. 2014. Perineuronal nets and GABAergic cells in the inferior colliculus  
703 of guinea pigs. *Front Neuroanat* **7**:53. doi:10.3389/fnana.2013.00053
- 704 Fujimoto H, Konno K, Watanabe M, Jinno S. 2017. Late postnatal shifts of parvalbumin and nitric oxide  
705 synthase expression within the GABAergic and glutamatergic phenotypes of inferior colliculus  
706 neurons. *J Comp Neurol* **525**:868–884. doi:10.1002/cne.24104
- 707 Gabernet L, Jadhav SP, Feldman DE, Carandini M, Scanziani M. 2005. Somatosensory integration  
708 controlled by dynamic thalamocortical feed-forward inhibition. *Neuron* **48**:315–327.  
709 doi:10.1016/j.neuron.2005.09.022

- 710 Geis HRAP, Borst JGG. 2013. Large GABAergic neurons form a distinct subclass within the mouse dorsal  
711 cortex of the inferior colliculus with respect to intrinsic properties, synaptic inputs, sound  
712 responses, and projections. *J Comp Neurol* **521**:189–202. doi:10.1002/cne.23170
- 713 Glendenning KK, Masterton RB. 1983. Acoustic chiasm: efferent projections of the lateral superior olive.  
714 *J Neurosci* **3**:1521–1537. doi:10.1523/JNEUROSCI.03-08-01521.1983
- 715 González-Hernández T, Mantolán-Sarmiento B, González-González B, Pérez-González H. 1996. Sources of  
716 GABAergic input to the inferior colliculus of the rat. *J Comp Neurol* **372**:309–326.  
717 doi:10.1002/(SICI)1096-9861(19960819)372:2<309::AID-CNE11>3.0.CO;2-E
- 718 Hashikawa T, Kawamura K. 1983. Retrograde labeling of ascending and descending neurons in the  
719 inferior colliculus. A fluorescent double labelling study in the cat. *Exp Brain Res* **49**:457–461.
- 720 Hassfurth B, Magnusson AK, Grothe B, Koch U. 2009. Sensory deprivation regulates the development of  
721 the hyperpolarization-activated current in auditory brainstem neurons. *Eur J Neurosci* **30**:1227–  
722 1238. doi:10.1111/j.1460-9568.2009.06925.x
- 723 Hernández O, Rees A, Malmierca MS. 2006. A GABAergic component in the commissure of the inferior  
724 colliculus in rat. *Neuroreport* **17**:1611–1614. doi:10.1097/01.wnr.0000236857.70715.be
- 725 Herrera M, Correa J, Sanchez F del C, Ruiz A. 1988. Stellate cells and their axonal patterns in the central  
726 nucleus of the inferior colliculus of the cat (*Felis domesticus*). *J Hirnforsch* **29**:393–402.
- 727 Ito T, Bishop DC, Oliver DL. 2009. Two classes of GABAergic neurons in the inferior colliculus. *J Neurosci*  
728 *Off J Soc Neurosci* **29**:13860–13869. doi:10.1523/JNEUROSCI.3454-09.2009
- 729 Ito T, Hioki H, Sohn J, Okamoto S, Kaneko T, Iino S, Oliver DL. 2015. Convergence of lemniscal and local  
730 excitatory inputs on large GABAergic tectothalamic neurons. *J Comp Neurol*.  
731 doi:10.1002/cne.23789
- 732 Ito T, Oliver DL. 2014. Local and commissural IC neurons make axosomatic inputs on large GABAergic  
733 tectothalamic neurons. *J Comp Neurol* **522**:3539–3554. doi:10.1002/cne.23623
- 734 Ito T, Oliver DL. 2012. The basic circuit of the IC: tectothalamic neurons with different patterns of  
735 synaptic organization send different messages to the thalamus. *Front Neural Circuits* **6**:48.  
736 doi:10.3389/fncir.2012.00048
- 737 Ito T, Oliver DL. 2010. Origins of Glutamatergic Terminals in the Inferior Colliculus Identified by  
738 Retrograde Transport and Expression of VGLUT1 and VGLUT2 Genes. *Front Neuroanat* **4**:135.  
739 doi:10.3389/fnana.2010.00135
- 740 Kato HK, Asinof SK, Isaacson JS. 2017. Network-Level Control of Frequency Tuning in Auditory Cortex.  
741 *Neuron* **95**:412–423.e4. doi:10.1016/j.neuron.2017.06.019
- 742 Kato HK, Gillet SN, Isaacson JS. 2015. Flexible Sensory Representations in Auditory Cortex Driven by  
743 Behavioral Relevance. *Neuron* **88**:1027–1039. doi:10.1016/j.neuron.2015.10.024
- 744 Klapoetke NC, Murata Y, Kim SS, Pulver SR, Birdsey-Benson A, Cho YK, Morimoto TK, Chuong AS,  
745 Carpenter EJ, Tian Z, Wang J, Xie Y, Yan Z, Zhang Y, Chow BY, Surek B, Melkonian M, Jayaraman  
746 V, Constantine-Paton M, Wong GK-S, Boyden ES. 2014. Independent optical excitation of distinct  
747 neural populations. *Nat Methods* **11**:338–346. doi:10.1038/nmeth.2836
- 748 Kuchibhotla KV, Gill JV, Lindsay GW, Papadoyannis ES, Field RE, Sten TAH, Miller KD, Froemke RC. 2017.  
749 Parallel processing by cortical inhibition enables context-dependent behavior. *Nat Neurosci*  
750 **20**:62–71. doi:10.1038/nn.4436
- 751 Lee S, Kruglikov I, Huang ZJ, Fishell G, Rudy B. 2013. A disinhibitory circuit mediates motor integration in  
752 the somatosensory cortex. *Nat Neurosci* **16**:1662–1670. doi:10.1038/nn.3544
- 753 Ma CL, Kelly JB, Wu SH. 2002. AMPA and NMDA receptors mediate synaptic excitation in the rat's  
754 inferior colliculus. *Hear Res* **168**:25–34.
- 755 Ma W-LD, Brenowitz SD. 2012. Single-neuron recordings from unanesthetized mouse dorsal cochlear  
756 nucleus. *J Neurophysiol* **107**:824–835. doi:10.1152/jn.00427.2011

- 757 Madisen L, Zwingman TA, Sunkin SM, Oh SW, Zariwala HA, Gu H, Ng LL, Palmiter RD, Hawrylycz MJ,  
758 Jones AR, Lein ES, Zeng H. 2010. A robust and high-throughput Cre reporting and  
759 characterization system for the whole mouse brain. *Nat Neurosci* **13**:133–140.  
760 doi:10.1038/nn.2467
- 761 Malmierca MS, Blackstad TW, Osen KK, Karagülle T, Molowny RL. 1993. The central nucleus of the  
762 inferior colliculus in rat: a Golgi and computer reconstruction study of neuronal and laminar  
763 structure. *J Comp Neurol* **333**:1–27. doi:10.1002/cne.903330102
- 764 Malmierca MS, Izquierdo MA, Cristaudo S, Hernández O, Pérez-González D, Covey E, Oliver DL. 2008. A  
765 discontinuous tonotopic organization in the inferior colliculus of the rat. *J Neurosci Off J Soc*  
766 *Neurosci* **28**:4767–4776. doi:10.1523/JNEUROSCI.0238-08.2008
- 767 Meininger V, Pol D, Derer P. 1986. The inferior colliculus of the mouse. A Nissl and Golgi study.  
768 *Neuroscience* **17**:1159–1179.
- 769 Mellott JG, Beebe NL, Schofield BR. 2018. Bilateral projections to the thalamus from individual neurons  
770 in the inferior colliculus. *J Comp Neurol*. [In press]
- 771 Mellott JG, Foster NL, Nakamoto KT, Motts SD, Schofield BR. 2014. Distribution of GABAergic cells in the  
772 inferior colliculus that project to the thalamus. *Front Neuroanat* **8**:17.  
773 doi:10.3389/fnana.2014.00017
- 774 Merchán M, Aguilar LA, Lopez-Poveda EA, Malmierca MS. 2005. The inferior colliculus of the rat:  
775 quantitative immunocytochemical study of GABA and glycine. *Neuroscience* **136**:907–925.  
776 doi:10.1016/j.neuroscience.2004.12.030
- 777 Milstein AD, Bloss EB, Apostolides PF, Vaidya SP, Dilly GA, Zemelman BV, Magee JC. 2015. Inhibitory  
778 Gating of Input Comparison in the CA1 Microcircuit. *Neuron* **87**:1274–1289.  
779 doi:10.1016/j.neuron.2015.08.025
- 780 Moore DR. 1988. Auditory brainstem of the ferret: sources of projections to the inferior colliculus. *J*  
781 *Comp Neurol* **269**:342–354. doi:10.1002/cne.902690303
- 782 Nakamoto KT, Sowick CS, Schofield BR. 2013. Auditory cortical axons contact commissural cells  
783 throughout the guinea pig inferior colliculus. *Hear Res* **306**:131–144.  
784 doi:10.1016/j.heares.2013.10.003
- 785 Nelken I, Young ED. 1994. Two separate inhibitory mechanisms shape the responses of dorsal cochlear  
786 nucleus type IV units to narrowband and wideband stimuli. *J Neurophysiol* **71**:2446–2462.
- 787 Okoyama S, Ohbayashi M, Ito M, Harada S. 2006. Neuronal organization of the rat inferior colliculus  
788 participating in four major auditory pathways. *Hear Res* **218**:72–80.  
789 doi:10.1016/j.heares.2006.04.004
- 790 Oliver DL. 1987. Projections to the inferior colliculus from the anteroventral cochlear nucleus in the cat:  
791 Possible substrates for binaural interaction. *J Comp Neurol* **264**:24–46.  
792 doi:10.1002/cne.902640104
- 793 Oliver DL. 1984. Dorsal cochlear nucleus projections to the inferior colliculus in the cat: A light and  
794 electron microscopic study. *J Comp Neurol* **224**:155–172. doi:10.1002/cne.902240202
- 795 Oliver DL, Kuwada S, Yin TC, Haberly LB, Henkel CK. 1991. Dendritic and axonal morphology of HRP-  
796 injected neurons in the inferior colliculus of the cat. *J Comp Neurol* **303**:75–100.  
797 doi:10.1002/cne.903030108
- 798 Oliver DL, Morest DK. 1984. The central nucleus of the inferior colliculus in the cat. *J Comp Neurol*  
799 **222**:237–264. doi:10.1002/cne.902220207
- 800 Oliver DL, Winer JA, Beckius GE, Saint Marie RL. 1994. Morphology of GABAergic neurons in the inferior  
801 colliculus of the cat. *J Comp Neurol* **340**:27–42. doi:10.1002/cne.903400104
- 802 Ono M, Bishop DC, Oliver DL. 2017. Identified GABAergic and Glutamatergic Neurons in the Mouse  
803 Inferior Colliculus Share Similar Response Properties. *J Neurosci* **37**:8952–8964.  
804 doi:10.1523/JNEUROSCI.0745-17.2017



- 805 Ono M, Bishop DC, Oliver DL. 2016. Long-Lasting Sound-Evoked Afterdischarge in the Auditory Midbrain.  
806 *Sci Rep* **6**:20757. doi:10.1038/srep20757
- 807 Ono M, Yanagawa Y, Koyano K. 2005. GABAergic neurons in inferior colliculus of the GAD67-GFP knock-  
808 in mouse: electrophysiological and morphological properties. *Neurosci Res* **51**:475–492.  
809 doi:10.1016/j.neures.2004.12.019
- 810 Orton LD, Papasavvas CA, Rees A. 2016. Commissural Gain Control Enhances the Midbrain  
811 Representation of Sound Location. *J Neurosci Off J Soc Neurosci* **36**:4470–4481.  
812 doi:10.1523/JNEUROSCI.3012-15.2016
- 813 Orton LD, Rees A. 2014. Intercollicular commissural connections refine the representation of sound  
814 frequency and level in the auditory midbrain. *eLife* **3**. doi:10.7554/eLife.03764
- 815 Osen KK. 1972. Projection of the cochlear nuclei on the inferior colliculus in the cat. *J Comp Neurol*  
816 **144**:355–372. doi:10.1002/cne.901440307
- 817 Palmer AR, Shackleton TM, Sumner CJ, Zobay O, Rees A. 2013. Classification of frequency response areas  
818 in the inferior colliculus reveals continua not discrete classes. *J Physiol* **591**:4003–4025.  
819 doi:10.1113/jphysiol.2013.255943
- 820 Paloff AM, Usunoff KG, Hinova-Palova DV. 1992. Ultrastructure of Golgi-impregnated and gold-toned  
821 neurons in the central nucleus of the inferior colliculus in the cat. *J Hirnforsch* **33**:361–407.
- 822 Peruzzi D, Sivaramakrishnan S, Oliver DL. 2000. Identification of cell types in brain slices of the inferior  
823 colliculus. *Neuroscience* **101**:403–416.
- 824 Petilla Interneuron Nomenclature Group, Ascoli GA, Alonso-Nanclares L, Anderson SA, Barrionuevo G,  
825 Benavides-Piccione R, Burkhalter A, Buzsáki G, Cauli B, Defelipe J, Fairén A, Feldmeyer D, Fishell  
826 G, Fregnac Y, Freund TF, Gardner D, Gardner EP, Goldberg JH, Helmstaedter M, Hestrin S,  
827 Karube F, Kisvárdy ZF, Lambolez B, Lewis DA, Marin O, Markram H, Muñoz A, Packer A,  
828 Petersen CCH, Rockland KS, Rossier J, Rudy B, Somogyi P, Staiger JF, Tamas G, Thomson AM,  
829 Toledo-Rodriguez M, Wang Y, West DC, Yuste R. 2008. Petilla terminology: nomenclature of  
830 features of GABAergic interneurons of the cerebral cortex. *Nat Rev Neurosci* **9**:557–568.  
831 doi:10.1038/nrn2402
- 832 Petreanu L, Huber D, Sobczyk A, Svoboda K. 2007. Channelrhodopsin-2-assisted circuit mapping of long-  
833 range callosal projections. *Nat Neurosci* **10**:663–668. doi:10.1038/nn1891
- 834 Pfeiffer CK, Xue M, He M, Huang ZJ, Scanziani M. 2013. Inhibition of inhibition in visual cortex: the logic  
835 of connections between molecularly distinct interneurons. *Nat Neurosci* **16**:1068–1076.  
836 doi:10.1038/nn.3446
- 837 Pi H-J, Hangya B, Kvitsiani D, Sanders JI, Huang ZJ, Kepecs A. 2013. Cortical interneurons that specialize in  
838 disinhibitory control. *Nature* **503**:521–524. doi:10.1038/nature12676
- 839 Portfors CV, Mayko ZM, Jonson K, Cha GF, Roberts PD. 2011. Spatial organization of receptive fields in  
840 the auditory midbrain of awake mouse. *Neuroscience* **193**:429–439.  
841 doi:10.1016/j.neuroscience.2011.07.025
- 842 Pouille F, Scanziani M. 2001. Enforcement of temporal fidelity in pyramidal cells by somatic feed-  
843 forward inhibition. *Science* **293**:1159–1163. doi:10.1126/science.1060342
- 844 Ramachandran R, Davis KA, May BJ. 1999. Single-unit responses in the inferior colliculus of decerebrate  
845 cats. I. Classification based on frequency response maps. *J Neurophysiol* **82**:152–163.
- 846 Reetz G, Ehret G. 1999. Inputs from three brainstem sources to identified neurons of the mouse inferior  
847 colliculus slice. *Brain Res* **816**:527–543.
- 848 Roberts MT, Seeman SC, Golding NL. 2013. A mechanistic understanding of the role of feedforward  
849 inhibition in the mammalian sound localization circuitry. *Neuron* **78**:923–935.  
850 doi:10.1016/j.neuron.2013.04.022

- 851 Rueden CT, Schindelin J, Hiner MC, DeZonia BE, Walter AE, Arena ET, Eliceiri KW. 2017. ImageJ2: ImageJ  
852 for the next generation of scientific image data. *BMC Bioinformatics* **18**:529.  
853 doi:10.1186/s12859-017-1934-z
- 854 Ryugo DK, Willard FH, Fekete DM. 1981. Differential afferent projections to the inferior colliculus from  
855 the cochlear nucleus in the albino mouse. *Brain Res* **210**:342–349.
- 856 Saint Marie RL. 1996. Glutamatergic connections of the auditory midbrain: selective uptake and axonal  
857 transport of D-[3H]aspartate. *J Comp Neurol* **373**:255–270. doi:10.1002/(SICI)1096-  
858 9861(19960916)373:2<255::AID-CNE8>3.0.CO;2-2
- 859 Sanchez JT, Gans D, Wenstrup JJ. 2007. Contribution of NMDA and AMPA receptors to temporal  
860 patterning of auditory responses in the inferior colliculus. *J Neurosci Off J Soc Neurosci* **27**:1954–  
861 1963. doi:10.1523/JNEUROSCI.2894-06.2007
- 862 Schindelin J, Arganda-Carreras I, Frise E, Kaynig V, Longair M, Pietzsch T, Preibisch S, Rueden C, Saalfeld  
863 S, Schmid B, Tinevez J-Y, White DJ, Hartenstein V, Eliceiri K, Tomancak P, Cardona A. 2012. Fiji:  
864 an open-source platform for biological-image analysis. *Nat Methods* **9**:676–682.  
865 doi:10.1038/nmeth.2019
- 866 Schmitz C, Hof PR. 2005. Design-based stereology in neuroscience. *Neuroscience* **130**:813–831.  
867 doi:10.1016/j.neuroscience.2004.08.050
- 868 Schofield BR. 2001. Origins of projections from the inferior colliculus to the cochlear nucleus in guinea  
869 pigs. *J Comp Neurol* **429**:206–220. doi:10.1002/1096-9861(20000108)429:2<206::AID-  
870 CNE3>3.0.CO;2-X
- 871 Schofield BR, Beebe NL. 2018. Subtypes of GABAergic cells in the inferior colliculus. *Hear Res*.  
872 doi:10.1016/j.heares.2018.10.001
- 873 Schofield BR, Schofield RM, Sorensen KA, Motts SD. 2007. On the use of retrograde tracers for  
874 identification of axon collaterals with multiple fluorescent retrograde tracers. *Neuroscience*  
875 **146**:773–783. doi:10.1016/j.neuroscience.2007.02.026
- 876 Sivaramakrishnan S, Oliver DL. 2006. Neuronal responses to lemniscal stimulation in laminar brain slices  
877 of the inferior colliculus. *J Assoc Res Otolaryngol JARO* **7**:1–14. doi:10.1007/s10162-005-0017-4
- 878 Sivaramakrishnan S, Oliver DL. 2001. Distinct K currents result in physiologically distinct cell types in the  
879 inferior colliculus of the rat. *J Neurosci Off J Soc Neurosci* **21**:2861–2877.
- 880 Spirou GA, Young ED. 1991. Organization of dorsal cochlear nucleus type IV unit response maps and  
881 their relationship to activation by bandlimited noise. *J Neurophysiol* **66**:1750–1768.  
882 doi:10.1152/jn.1991.66.5.1750
- 883 Stiebler I, Ehret G. 1985. Inferior colliculus of the house mouse. I. A quantitative study of tonotopic  
884 organization, frequency representation, and tone-threshold distribution. *J Comp Neurol* **238**:65–  
885 76. doi:10.1002/cne.902380106
- 886 Stokes CCA, Isaacson JS. 2010. From dendrite to soma: dynamic routing of inhibition by complementary  
887 interneuron microcircuits in olfactory cortex. *Neuron* **67**:452–465.  
888 doi:10.1016/j.neuron.2010.06.029
- 889 Sturm J, Nguyen T, Kandler K. 2014. Development of intrinsic connectivity in the central nucleus of the  
890 mouse inferior colliculus. *J Neurosci Off J Soc Neurosci* **34**:15032–15046.  
891 doi:10.1523/JNEUROSCI.2276-14.2014
- 892 Taniguchi H, He M, Wu P, Kim S, Paik R, Sugino K, Kvitsiani D, Kvitsani D, Fu Y, Lu J, Lin Y, Miyoshi G,  
893 Shima Y, Fishell G, Nelson SB, Huang ZJ. 2011. A resource of Cre driver lines for genetic targeting  
894 of GABAergic neurons in cerebral cortex. *Neuron* **71**:995–1013.  
895 doi:10.1016/j.neuron.2011.07.026
- 896 Tremblay R, Lee S, Rudy B. 2016. GABAergic Interneurons in the Neocortex: From Cellular Properties to  
897 Circuits. *Neuron* **91**:260–292. doi:10.1016/j.neuron.2016.06.033

- 898 Tyner CF. 1975. The naming of neurons: applications of taxonomic theory to the study of cellular  
899 populations. *Brain Behav Evol* **12**:75–96.
- 900 Wallace ML, Saunders A, Huang KW, Philson AC, Goldman M, Macosko EZ, McCarroll SA, Sabatini BL.  
901 2017. Genetically Distinct Parallel Pathways in the Entopeduncular Nucleus for Limbic and  
902 Sensorimotor Output of the Basal Ganglia. *Neuron* **94**:138-152.e5.  
903 doi:10.1016/j.neuron.2017.03.017
- 904 Wallace MN, Shackleton TM, Palmer AR. 2012. Morphological and Physiological Characteristics of  
905 Laminar Cells in the Central Nucleus of the Inferior Colliculus. *Front Neural Circuits* **6**.  
906 doi:10.3389/fncir.2012.00055
- 907 West MJ, Slomianka L, Gundersen HJ. 1991. Unbiased stereological estimation of the total number of  
908 neurons in the subdivisions of the rat hippocampus using the optical fractionator. *Anat Rec*  
909 **231**:482–497. doi:10.1002/ar.1092310411
- 910 Willard FH, Ryugo DK. 1983. Anatomy of the central auditory system In: Willott JF, editor. *The Auditory*  
911 *Psychobiology of the Mouse*. Springfield, Ill: C.C. Thomas. pp. 201–304.
- 912 Willott JF, Urban GP. 1978. Response properties of neurons in nuclei of the mouse inferior colliculus. *J*  
913 *Comp Physiol* **127**:175–184. doi:10.1007/BF01352302
- 914 Winer JA, Larue DT, Diehl JJ, Hefti BJ. 1998. Auditory cortical projections to the cat inferior colliculus. *J*  
915 *Comp Neurol* **400**:147–174. doi:10.1002/(SICI)1096-9861(19981019)400:2<147::AID-  
916 CNE1>3.0.CO;2-9
- 917 Winer JA, Schreiner C, editors. 2005. *The inferior colliculus: with 168 illustrations*. New York, NY:  
918 Springer.
- 919 Wu SH, Ma CL, Kelly JB. 2004. Contribution of AMPA, NMDA, and GABA(A) receptors to temporal pattern  
920 of postsynaptic responses in the inferior colliculus of the rat. *J Neurosci Off J Soc Neurosci*  
921 **24**:4625–4634. doi:10.1523/JNEUROSCI.0318-04.2004
- 922 Young ED, Brownell WE. 1976. Responses to tones and noise of single cells in dorsal cochlear nucleus of  
923 unanesthetized cats. *J Neurophysiol* **39**:282–300.
- 924 Zeng H, Sanes JR. 2017. Neuronal cell-type classification: challenges, opportunities and the path  
925 forward. *Nat Rev Neurosci* **18**:530–546. doi:10.1038/nrn.2017.85  
926
